# Supplementary material
Source: Research Square preprint supplement (doi:10.21203/rs.3.rs-9195106/v1)
Supplement: Supplementary file 1 [file 00c840130f1a19d1be95a36e.docx]

**Table S3.**

*Invariance testing results of the path analysis across disease groups.*

| *Cross-sectional model across disease groups* | | | | | | | | | | | | | | | | |
| --- | --- | --- | --- | --- | --- | --- | --- | --- | --- | --- | --- | --- | --- | --- | --- | --- |
|  |  |  |  |  | Overall Fit Indices | | | |  | Comparison Fit Indices | | | | | | |
| M.1 | Hypothesised Model | X*2* | df | *p* | CFI | (N[NFI] TLI) | RMSEA (90% CI) | SRMR |  | Model comparison | ΔX2 | *p* | ΔCFI | Δ(N[NFI] TLI) | ΔRMSEA | ΔSRMR |
| MC1 | Unconstrained including *abw(s)* | 62.84 | 40 | **.**01 | .98 | 1.00 | .06 (.05, .09) | .06 |  | - | - |  | - | - | - | - |
| MC2 | Unconstrained Excluding *abw(s)* | 64.11 | 8 | .00 | .96 | 1.00 | .16 (.13, .19) | .06 |  | MC1 vs MC2 | 25.41 | .79 | .02 | .00 | -.10 | .00 |
| MC3 | Full Constrained Less Constraints 3/4/13/15/20/25 | 85.02 | 30 | .00 | .97 | 1.00 | .08 (.06, .10) | .07 |  | MC3 vs MC2 | 20.60 | .66 | .00 | .00 | -.08 | .01 |
| MC4 | Full Constrained Excluding *abw(s)* | 133.76 | 36 | .00 | .94 | 1.00 | .09 | .08 |  | MC4 vs MC3 | **62.81** | **<.0001** | -.03 | .00 | .02 | .02 |
| *Longitudinal model across disease groups* | | | | | | | | | | | | | | | | |
|  |  |  |  |  | Overall Fit Indices | | | |  |  |  | | Comparison Fit Indices | | | |
|  |  | X*2* | df | *p* | CFI | (N[NFI] TLI) | RMSEA (90% CI) | SRMR |  | Model comparison | ΔX2 | *p* | ΔCFI | Δ(N[NFI] TLI) | ΔRMSEA | ΔSRMR |
| ML1 | Unconstrained Model Including *abw(s)* | 175.99 | 60 | .00 | .85 | 1.00 | .10 (.08, .11) | .09 |  | **-** | **-** | **-** | **-** | **-** | **-** | **-** |
| ML2 | Unconstrained Model Excluding *abw(s)* | 230.29 | 28 | .00 | .82 | 1.00 | .16 (.14, 18) | .12 |  | ML1 vs ML2 | 28.85 | .63 | .04 | .00 | -.06 | -.02 |
| ML3 | Full Constrained Less Constraints 4/7/11 | 190.20 | 51 | .00 | .88 | 1.00 | .09 (.08, .11) | .12 |  | ML3 vs ML2 | 19.95 | .94 | .06 | .00 | -.09 | .01 |
| ML4 | Full Constrained Excluding *abw(s)* | 249.16 | 58 | .00 | .83 | 1.00 | .10 (.09, .12) | .12 |  | ML4 vs ML3 | **19.19** | **.01** | -.04 | .00 | .01 | .00 |

*Note.* MC= Cross-sectional model; ML = Longitudinal. Constraints: 3= Neuroticism -> AS; 4= Neuroticism -> IU; 7= AS -> CESD-R; 11= DT -> CESD-R; 13= RRS -> CESD-R; 15= Moderator -> CESD-R; 20= Age -> RRS; 25= Gender -> CESD-R.
