# Supplementary material
Source: Research Square preprint supplement (doi:10.21203/rs.3.rs-9195106/v1)
Supplement: Supplementary file 2 [file 0cec55f490297d27e2d32391.docx]

**Table S1.**

*Reliability coefficients for explanatory, outcome and moderator variables*

| Scale | Number of items | Internal reliability (Cronbach alpha α) | | Test-retest reliability (Pearson’s *r*) | |
| --- | --- | --- | --- | --- | --- |
|  |  | Coefficient | | Coefficient | |
|  |  | MS | EMS | MS | EMS |
| Outcomes variables |  |  |  |  |  |
| CESD-R | 20 | .92a | .94a | .64b | .60b |
| GAD-7 | 7 | .90a | .90a | .75a | .55c |
| Explanatory variables |  |  |  |  |  |
| BFI (neuroticism subscale) | 8 | .84b | .80b | - | - |
| ASI-R | 36 | .97a | .95a | .81a | .67b |
| IUS | 27 | .96a | .95a | .69b | .61b |
| DTS | 15 | .93a | .92a | .68b | .51c |
| RRS | 10 | .85b | .82b | .68b | .55 c |
| Moderator variables |  |  |  |  |  |
| BFI (fatigue) | 9 | .71c | .65d | .70 b | .50 c |
| POQ-SF | 19 | - | .70c | - | .59 c |
| SRDSS | 3 | .82b | - | .74 b | - |

*Note.* Internal reliability levels: a≥90= ‘excellent’; b80-89= ‘good’; c=.70-.79= ‘acceptability’; d.60-.69= ‘questionable’ (Gliem et al., 2003). Test-retest reliability levels: a≥.75= ‘excellent’; b.60-.74= ‘good’; c.40-.59= ‘fair’ (Cicchetti, 1994).

Abbreviations: MS= Multiple Sclerosis; EMS= Endometriosis; CESD-R= Centre for Epidemiologic Studies Depression Scale Revised; GAD-7= Generalised Anxiety Disorder scale; BFI (neuroticism subscale)= Big Five Inventory; ASI-R= Anxiety Sensitivity Index Revised; IUS= Intolerance of Uncertainty Scale; DTS= Distress Tolerance Scale; RRS= Ruminative Response Scale; IUS= DTS= RRS= BFI (fatigue)= Brief Fatigue Inventory; POQ-SF= Pain Outcomes Questionnaire-Short Form; SRDSS= Self-Administered Expanded Disability Status Scale.
