# Supplementary material
Source: Research Square preprint supplement (doi:10.21203/rs.3.rs-9195106/v1)
Supplement: Supplementary file 3 [file 3737980d77d81f3fee3652b6.docx]

**Table S4.**

*Unstandardised effects, standardised effects, and confidence intervals, standard errors, and proportion mediated for cross-sectional and longitudinal models tested in the MS group.*

|  |  |  | Cross-sectional model | | | | Longitudinal model | | | | |
| --- | --- | --- | --- | --- | --- | --- | --- | --- | --- | --- | --- |
| Effect/Pathway |  |  | | Effect Size | | |  | | Effect Size | | |
|  | Path | *B* [95% LLCI ULCI] | *SE* | *ß* [95% LLCI ULCI] | *SE* | *PM* | *B* [95% LLCI ULCI] | *SE* | *ß* [95% LLCI ULCI] | *SE* | *PM* |
| **Neuroticism** |  |  |  |  |  |  |  |  |  |  |  |
| AS | a | 1.67 [1.14, 2.20] | .27 | .35 [.24, .46] | *.06* |  | 1.73 [.98, 2.48] | .38 | .36 [.21, .52] | .08 |  |
| IU |  | 1.58 [1.23, 1.93] | .18 | .48 [.38, .59] | *.05* |  | 1.46 [1.00, 1.91] | .23 | .45 [.31, .58] | .07 |  |
| DT |  | -.93 [-1.20, -.67] | .13 | -.46 [-.59, -.33] | .07 |  | -.93 [-1.28, -.59] | .18 | -.46 [-.63, -.29] | .09 |  |
| Rumination |  | .37 [.26, .48] | .06 | .39 [.27, .51] | .06 |  | .37 [.22, .52] | .08 | .39 [.24, .54] | .08 |  |
| **Depression** |  |  |  |  |  |  |  |  |  |  |  |
| Total Effect | c | .94 [.63, 1.25] | .16 | .36 [.24, .47] | .05 |  | .21 [-.21, .64] | .22 | .08 [-.09, .25] | .08 |  |
| Direct Effect | c’ | .31 [.02, .60] | .15 | .12 [.01, .23] | .06 |  | .00 [-.39, .40] | .19 | -.00 [-.16, .15] | .08 |  |
| AS | b | .02 [-.05, .10] | .04 | .44 [-.10, .19] | .07 |  | .03 [-.05, .10] | .04 | .05 [-.09, .19] | .07 |  |
| IU |  | -.01 [-.14, .13] | .07 | -.01 [-.18, .16] | .09 |  | -.02 [-.19, .15] | .08 | -.02 [-.23, .19] | .10 |  |
| DT |  | -.18 [-.33, -.03] | .08 | -.14 [-.26. -.02] | .06 |  | .01 [-.16, .18] | .08 | .00 [-.13, .14] | .06 |  |
| Rumination |  | .90 [.61, 1.18] | .15 | .32 [.21, .42] | .05 |  | .20 [-.35, .76] | .28 | .08 [-.13, .28] | .10 |  |
| Indirect Effects | ab |  |  |  |  |  |  |  |  |  |  |
| AS |  | .05 [-.03, .14] | .04 | .02 [-.01, .06] | .02 | .06 | .03 [-.05, .13] | .05 | .01 [-.02, .05] | .02 | .31 |
| IU |  | .08 [-.04, .21] | .06 | .03 [-.02, .08] | .02 | .08 | .10 [-.04, .25] | .07 | .04 [-.02, .10] | .03 | .94 |
| DT |  | .17 [.03, .32] | .08 | .17 [.02, .33] | .03 | .18 | -.01 [-.13, .12] | .06 | -.00 [-.05, .05] | .03 | -.04 |
| Rumination |  | .28 [.18, .40] | .06 | .11 [.07, .15] | .02 | .28 | .07 [-.13, .29] | .10 | .03 [-.05, .11] | .04 | .36 |
| Interaction Effects | *abw* |  |  |  |  |  |  |  |  |  |  |
| ASxSRDSS |  | -.00 [-.04, .04] | .02 | -.01 [-.16, .15] | .08 |  | -.00 [-.04, .04] | .02 | -.02 [-.16, .13] | .07 |  |
| IUxSRDSS |  | .03 [-.04, .09] | .03 | .07 [-.11, .25] | .09 |  | .01 [-.07, .08] | .04 | .02 [-.18, .21] | .10 |  |
| DTxSRDSS |  | .07 [-.01, .14] | .04 | .12 [-.01, .24] | .07 |  | .02 [-.08, .12] | .05 | .03 [-.12, .18] | .08 |  |
| RuminationxSRDSS |  | .09 [-.10, .28] | .10 | .07 [-.08, .21] | .07 |  | .06 [-.19, .31] | .13 | .04 [-.14, .23] | .09 |  |
| SRDSS | *bw* | .20 [-.67, 1.08] | .45 | .02 [-.08, .12] | .05 |  | .39 [-.90, 1.67] | .65 | .05 [-.10, .20] | .08 |  |
| **Anxiety** |  |  |  |  |  |  |  |  |  |  |  |
| Total Effect | c | .94 [.62, 1.25] | .16 | .56 [.47, .65] | .05 |  | .11 [-.02, .24] | 07 | .13 [-.02, .27] | .07 |  |
| Direct Effect | c’ | .27 [.16, .33] | .04 | .28 [19, .38] | .05 |  | .06 [-.07, .19] | .07 | .07 [-.08, .22] | .08 |  |
| AS | b | .03 [.00, .06] | .01 | .16 [.02, .30] | .05 |  | .01 [-.02, .04] | .01 | .06 [-.09, .21] | .07 |  |
| IU |  | .05 [.01, .08] | .02 | .17 [.03, .31] | .06 |  | -.04 [-.08, .01] | .02 | -.13 [-.32, .05] | .08 |  |
| DT |  | -.06 [-.10, -.01] | .03 | -.13 [-.24, -.02] | .05 |  | -.09 [-.15, -.03] | .03 | -.21 [-.35, -.08] | .07 |  |
| Rumination |  | .18 [.05, .30] | .07 | .19 [.05, .33] | .06 |  | .02 [-.13, .16] | .07 | .02 [-.14, .17] | .08 |  |
| Indirect Effects | ab |  |  |  |  |  |  |  |  |  |  |
| AS |  | .04 [.02, .07] | .02 | .05 [.02, .08] | .02 | .04 | .02 [-.03, .07] | .02 | .02 [-.03, .08] | .03 | .17 |
| IU |  | .06 [.02, .10] | .04 | .07 [.03, .11] | .03 | .06 | -.01 [-.07, .05] | .03 | -.01 [-.07, .06] | .03 | -.04 |
| DT |  | .04 [.02, .07] | .03 | .05 [.03, .09] | .03 | .10 | .08 [.03, .15] | .03 | .10 [.04, .17] | .04 | .76 |
| Rumination |  | .05 [.02, .08] | .03 | .05 [.02, .08] | .03 | .09 | .01 [-.05, .06] | .02 | .00 [-.03, .04] | .03 | .05 |
| Interaction Effects | *abw* |  |  |  |  |  |  |  |  |  |  |
| ASxSRDSS |  | .01 [-.01, .02] | .01 | .06 [-.08, .20] | .07 |  | .00 [-.01, .01] | .01 | .01 [-.14, .15] | .07 |  |
| IUxSRDSS |  | .01 [-.01, .03] | .01 | .07 [-.08, .22] | .08 |  | -.01 [-.03, .02] | .01 | -.05 [-.23, .13] | .09 |  |
| DTxSRDSS |  | .02 [-.01, .04] | .01 | .07 [-.06, .20] | .06 |  | -.01 [-.04, .02] | .02 | -.05 [-.19, .09] | .07 |  |
| RuminationxSRDSS |  | -.01 [-.07, .05] | .03 | -.02 [-.16, .12] | .07 |  | .01 [-.06, .08] | .04 | .02 [-.13, .17] | .07 |  |
| SRDSS | *bw* | .23 [-.08, .54] | .16 | .08 [-.03, .19] | .05 |  | .52 [.13, .91] | .19 | .18 [.05, .32] | .07 |  |

*Note.* Abbreviations: B=unstandardized coefficient; *ß=* standardised coefficient;LLCI = lower limit of 95% confidence interval; ULCI = upper limit of 95% confidence interval; SE= standard error; *PM*= proportion mediated statistic; a= pathway from independent variable to mediator; c= total effect of all variables (including moderator) on dependent variable; c’= direct effect of independent variable on dependent variable (i.e., after controlling for mediators); ab= indirect effect via mediator; abw= moderated mediation effect; bw= moderator effect on dependent variable. AS= Anxiety sensitivity; IUS= intolerance of uncertainty; DT= distress tolerance; SRDSS= ambulation (proxy for overall MS disability).
