# Supplementary material
Source: Research Square preprint supplement (doi:10.21203/rs.3.rs-9195106/v1)
Supplement: Supplementary file 4 [file 73c781b2355c6b351f97d536.docx]

**Table S5.**

*Unstandardised effects, standardised effects, and confidence intervals, standard errors, and proportion mediated for cross-sectional and longitudinal models tested in the EMS group.*

|  |  |  | Cross-sectional model | | | | Longitudinal model | | | | |
| --- | --- | --- | --- | --- | --- | --- | --- | --- | --- | --- | --- |
| Effect/Pathway |  |  | | Effect Size | | |  | | Effect Size | | |
|  | Path | *B* [95% LLCI ULCI] | *SE* | *ß* [95% LLCI ULCI] | *SE* | *PM* | *B* [95% LLCI ULCI] | *SE* | *ß* [95% LLCI ULCI] | *SE* | *PM* |
| **Neuroticism** |  |  |  |  |  |  |  |  |  |  |  |
| AS | a | .65 [.13, 1.18] | .27 | .14 [.03, .25] | .06 |  | .58 [-.13, 1.29] | .36 | .12 [-.03, .27] | .08 |  |
| IU |  | .77 [.42, 1.07] | .18 | .23 [.13, .34] | .05 |  | .91 [.48, 1.34] | .22 | .28 [.15, .41] | .07 |  |
| DT |  | -.63 [-.86, -.41] | .12 | -.31 [-.42, -.20] | .06 |  | -.63 [-.93, -.34] | .15 | -.31 [-.46. -.17] | .07 |  |
| Rumination |  | .27 [.17, .37] | .05 | .29 [.18, .39] | .05 |  | .27 [.14, .41] | .07 | .29 [.15, .43] | .07 |  |
| **Depression** |  |  |  |  |  |  |  |  |  |  |  |
| Total Effect | c | .86 [.61, 1.12] | .13 | .33 [.23, .42] | .05 |  | -.12 [-.50, .25] | .18 | -.05 [-.19, .09] | .06 |  |
| Direct Effect | c’ | .61 [.35, .87] | .13 | .23 [.13, .33] | .05 |  | .03 [-.36, .42] | .19 | .01 [-.14, .16] | .05 |  |
| AS | b | .03 [-.03, .10] | .03 | .06 [-.06, .18] | .06 |  | -.08 [-.15, -.01] | .03 | -.16 [-.29, -.03] | .06 |  |
| IU |  | .09 [-.02, .19] | .05 | .11 [-.02, .23] | .06 |  | .12 [-.01, .24] | .06 | .15 [-.01 .31] | .08 |  |
| DT |  | -.12 [-.27, .03] | .08 | -.09 [-.21, .02] | .06 |  | .17 [.01, .36] | .09 | .14 [.01, .29] | .07 |  |
| Rumination |  | .44 [.16, .72] | .14 | .15 [.06, .25] | .05 |  | .06 [-.36, .47] | .20 | .02 [-.13, .18] | .07 |  |
| Indirect Effects | ab |  |  |  |  |  |  |  |  |  |  |
| AS |  | .02 [-.01, .07] | .03 | .01 [-.00, .03] | .01 | .03 | -.09 [-.19, -.01] | .04 | -.04 [-.08, -.01] | .01 | .56 |
| IU |  | .04 [-.02, .11] | .07 | .02 [-.01, .04] | .01 | .05 | .06 [-.02, .16] | .04 | .03 [-.01, .06] | .02 | -.35 |
| DT |  | .08 [-.02, .19] | .09 | .03 [-.01, .07] | .02 | .09 | -.13 [-.28, .00] | .07 | -.05 [-.12, -.03] | .03 | .77 |
| Rumination |  | .14 [.05, .24] | .10 | .05 [.02, .09] | .02 | .17 | .02 [-10, .13] | .06 | .01 [-.04, .05] | .01 | -.11 |
| Interaction Effects | *abw* |  |  |  |  |  |  |  |  |  |  |
| ASxPOQ |  | -.00 [-.00, .00] | .00 | -.03 [-.14, .08] | .06 |  | -.00 [-.00, .00] | .00 | -.03 [-.18, .13] | .08 |  |
| IUxPOQ |  | .00 [-.00, .00] | .00 | .02 [-.08, .11] | .05 |  | .00 [-.00, .01] | .00 | .03 [-.12, .18] | .07 |  |
| DTxPOQ |  | .00 [-.00, .01] | .00 | .04 [-.04, .12] | .04 |  | .00 [-.00, .01] | .00 | .06 [-.07, .19] | .07 |  |
| RuminationxPOQ |  | .01 [-.00, .02] | .01 | .07 [-.02, .15] | .04 |  | .00 [-.01, .01] | .01 | .01 [-.12, .14] | .07 |  |
| POQ | *bw* | .25 [.19, .31] | .03 | .43 [.31, .53] | .05 |  | .08 [-.02, .17] | .05 | .13 [-.02, .28] | .07 |  |
| **Anxiety** |  |  |  |  |  |  |  |  |  |  |  |
| Total Effect | c | .45 [.37, .53] | .04 | .51 [.41, .60] | .05 |  | .17 [.03, .31] | .07 | .20 [.05, .35] | .08 |  |
| Direct Effect | c’ | .34 [.26, .43] | .04 | .39 [.29, .48] | .05 |  | .17 [.03, .31] | .07 | .20 [.04, .36] | .08 |  |
| AS | b | .03 [.01, .05] | .01 | .14 [.04, .24] | .05 |  | .03 [.00, .06] | .01 | .18 [.03, .34] | .07 |  |
| IU |  | .03 [.01, .06] | .02 | .12 [.02, .23] | .05 |  | .01 [-.04, .06] | .02 | .04 [-.13, .22] | .08 |  |
| DT |  | -.06 [-.10, -.02] | .02 | -.14 [-.24, -.04] | .05 |  | .06 [-.01, .13] | .03 | .14 [-.02, .31] | .08 |  |
| Rumination |  | .11 [.01, .21] | .05 | .12 [.01, .23] | .06 |  | .04 [-.11, .17] | .07 | .04 [-.11, .19] | .08 |  |
| Indirect Effects | ab |  |  |  |  |  |  |  |  |  |  |
| AS |  | .02 [.00, .04] | .01 | .02 [.00, .04] | .01 | .04 | .02 [-.00, .06] | .02 | .02 [-.01, .06] | .02 | .11 |
| IU |  | .03 [.01, .05] | .02 | .03 [.01, .06] | .01 | .06 | -.01 [-.05, .03] | .02 | -.01 [-.06, .03] | .02 | -.08 |
| DT |  | .04 [.01, .07] | .02 | .04 [.02, .08] | .02 | .08 | -.04 [-.09, .00] | .02 | -.04 [-.01, .00] | .02 | -.22 |
| Rumination |  | .03 [.00, .06] | .03 | .03 [.00, .07] | .02 | .07 | .01 [-.03, .05] | .02 | .01 [-.03, .06] | .02 | .06 |
| Interaction Effects | *abw* |  |  |  |  |  |  |  |  |  |  |
| ASxPOQ |  | .00 [-.00, .00] | .00 | .06 [-.04, .16] | .05 |  | -.00 [-.00, .00] | .00 | -.05 [-.21, .11] | .08 |  |
| IUxPOQ |  | -.00 [-.00, .00] | .00 | -.05 [-.14, .04] | .04 |  | .00 [-.00, .00] | .00 | .06 [-.10, .22] | .08 |  |
| DTxPOQ |  | -.00 [-.00, .00] | .00 | -.03 [-.12, .06] | .05 |  | .00 [-.00, .00] | .00 | .03 [-.11, .16] | .07 |  |
| RuminationxPOQ |  | .00 [-.00, .00] | .00 | .04 [-.05, .13] | .05 |  | .00 [-.01, .01] | .00 | .00 [-.13, .14] | .07 |  |
| POQ | *bw* | .04 [.02, .06] | .01 | .19 [.09, .29] | .05 |  | .01 [-.02, .04] | .02 | .03 [-.12, .18] | .07 |  |

*Note.* Abbreviations: B=unstandardized centered coefficient; *ß=* standardised coefficient;LLCI = lower limit of 95% confidence interval; ULCI = upper limit of 95% confidence interval; SE= standard error; *PM*= proportion mediated statistic; a= pathway from independent variable to mediator; c= total effect of all variables (including moderator) on dependent variable; c’= direct effect of independent variable on dependent variable (i.e., after controlling for mediators); ab= indirect effect via mediator; abw= moderated mediation effect; bw= moderator effect on dependent variable. AS= Anxiety sensitivity; IUS= intolerance of uncertainity; DT= distress tolerance; POQ= pain severity.
