# Supplementary material
Source: Research Square preprint supplement (doi:10.21203/rs.3.rs-9195106/v1)
Supplement: Supplementary file 5 [file 79241468f0137dcee2f1e9ab.docx]

**Figures S3-6.** Interactions plot illustrating moderation effects of gait-disability level (SRDSS) on the cross-sectional relationships between cognitive factors and anxiety symptoms in the MS group.

**
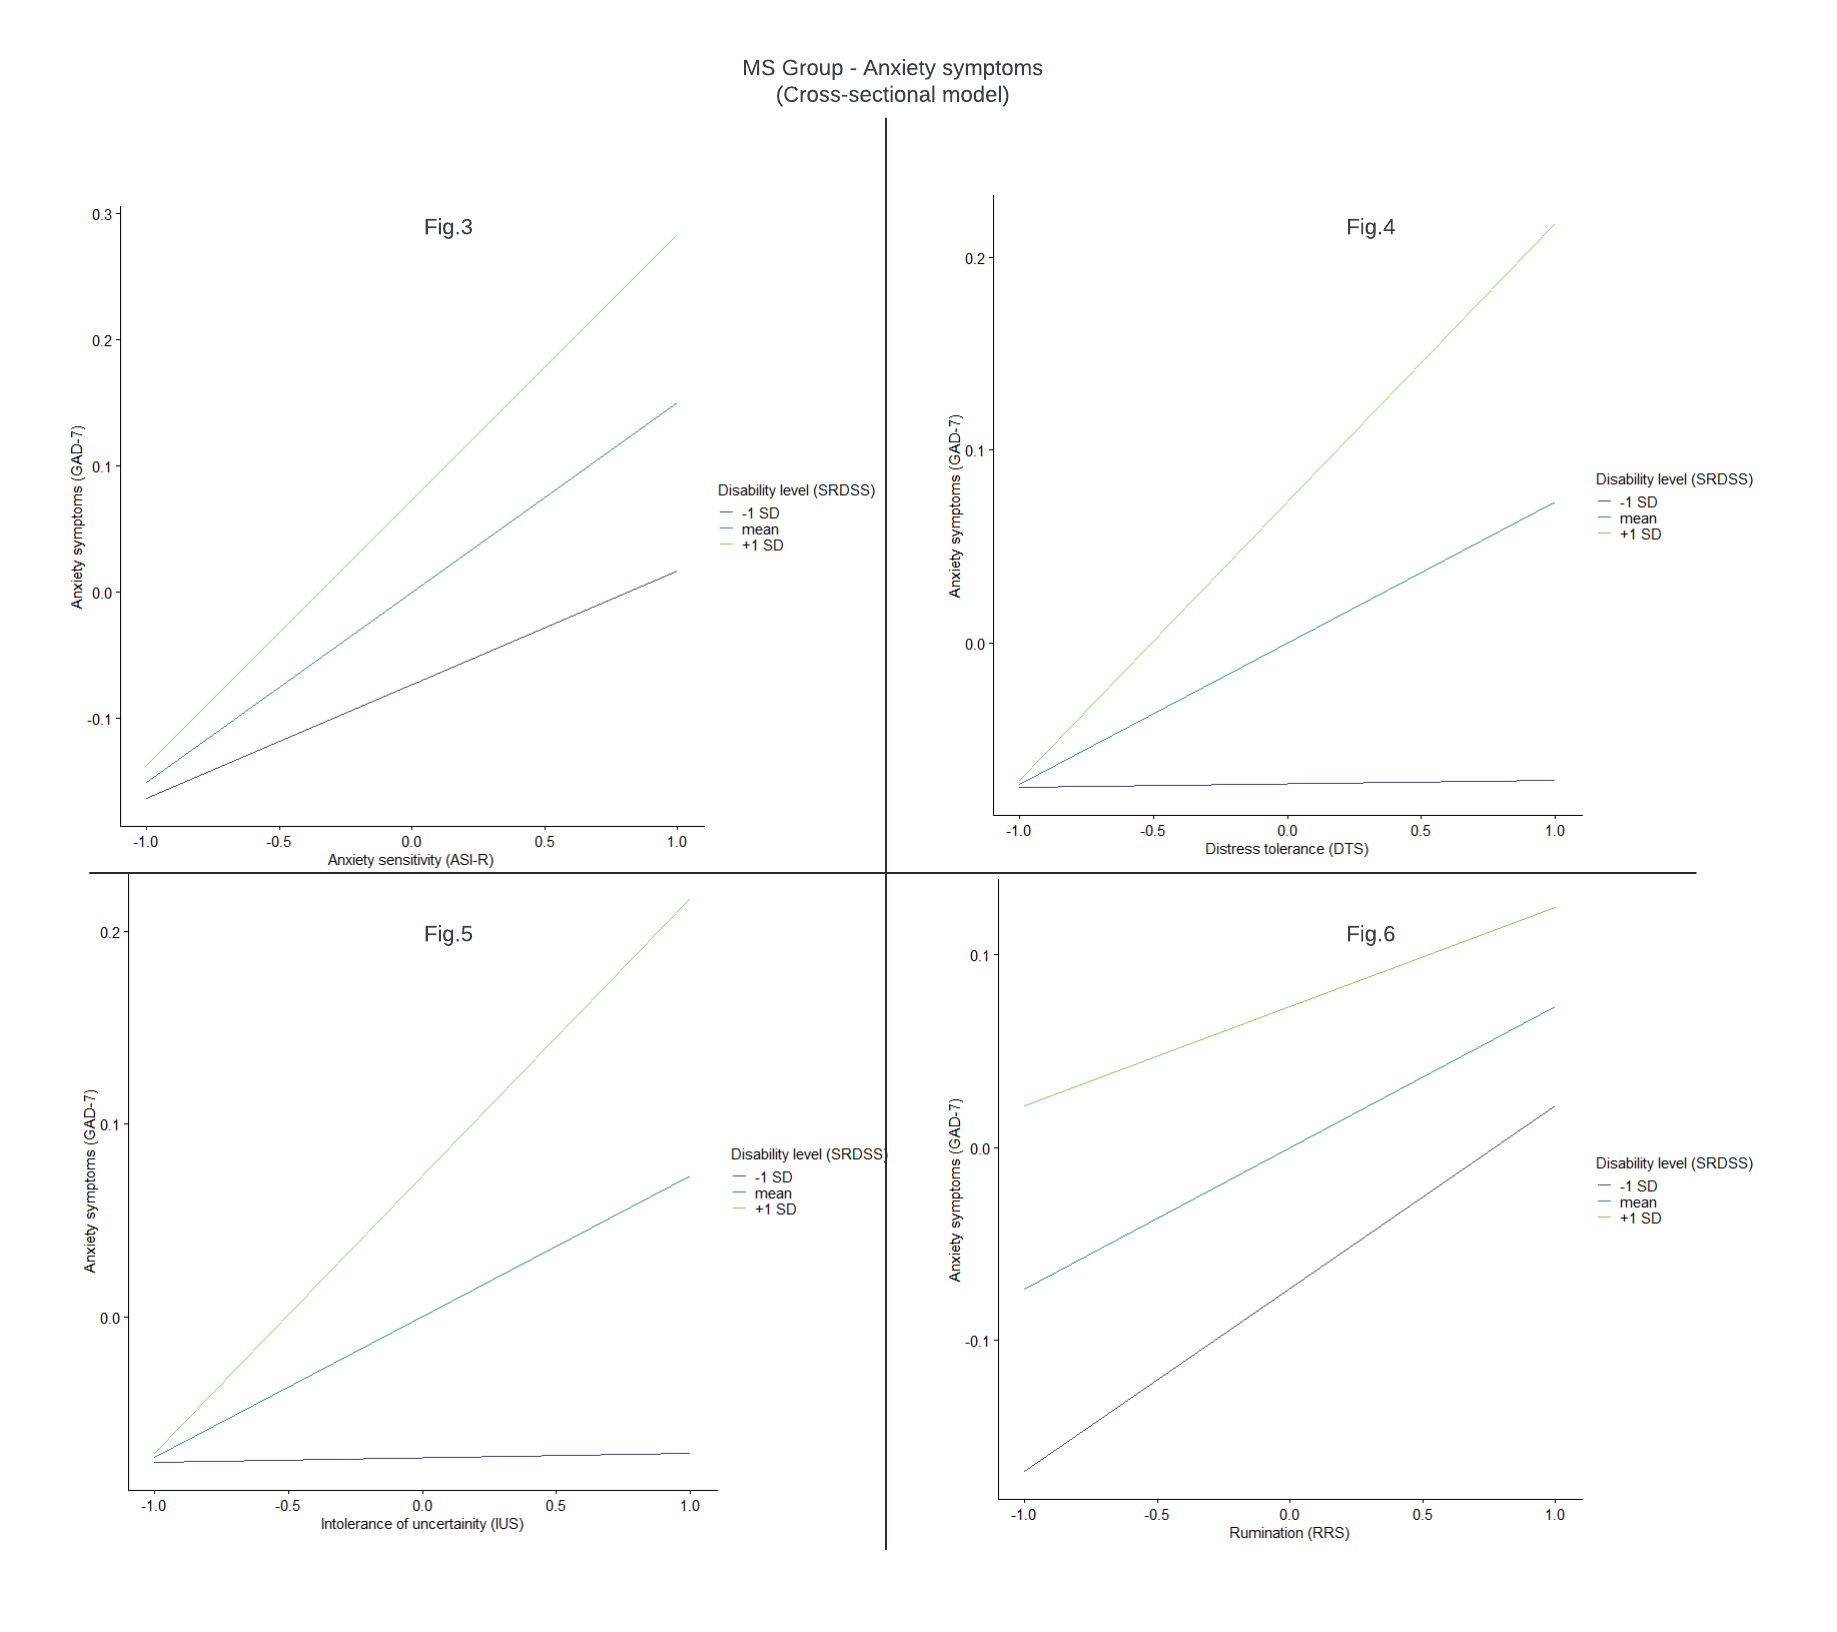
**

**Figures S7-10.** Interactions plot illustrating the moderation effects of gait-disability level (SRDSS) on the cross-sectional relationships between cognitive factors and depressive symptoms in the MS group.


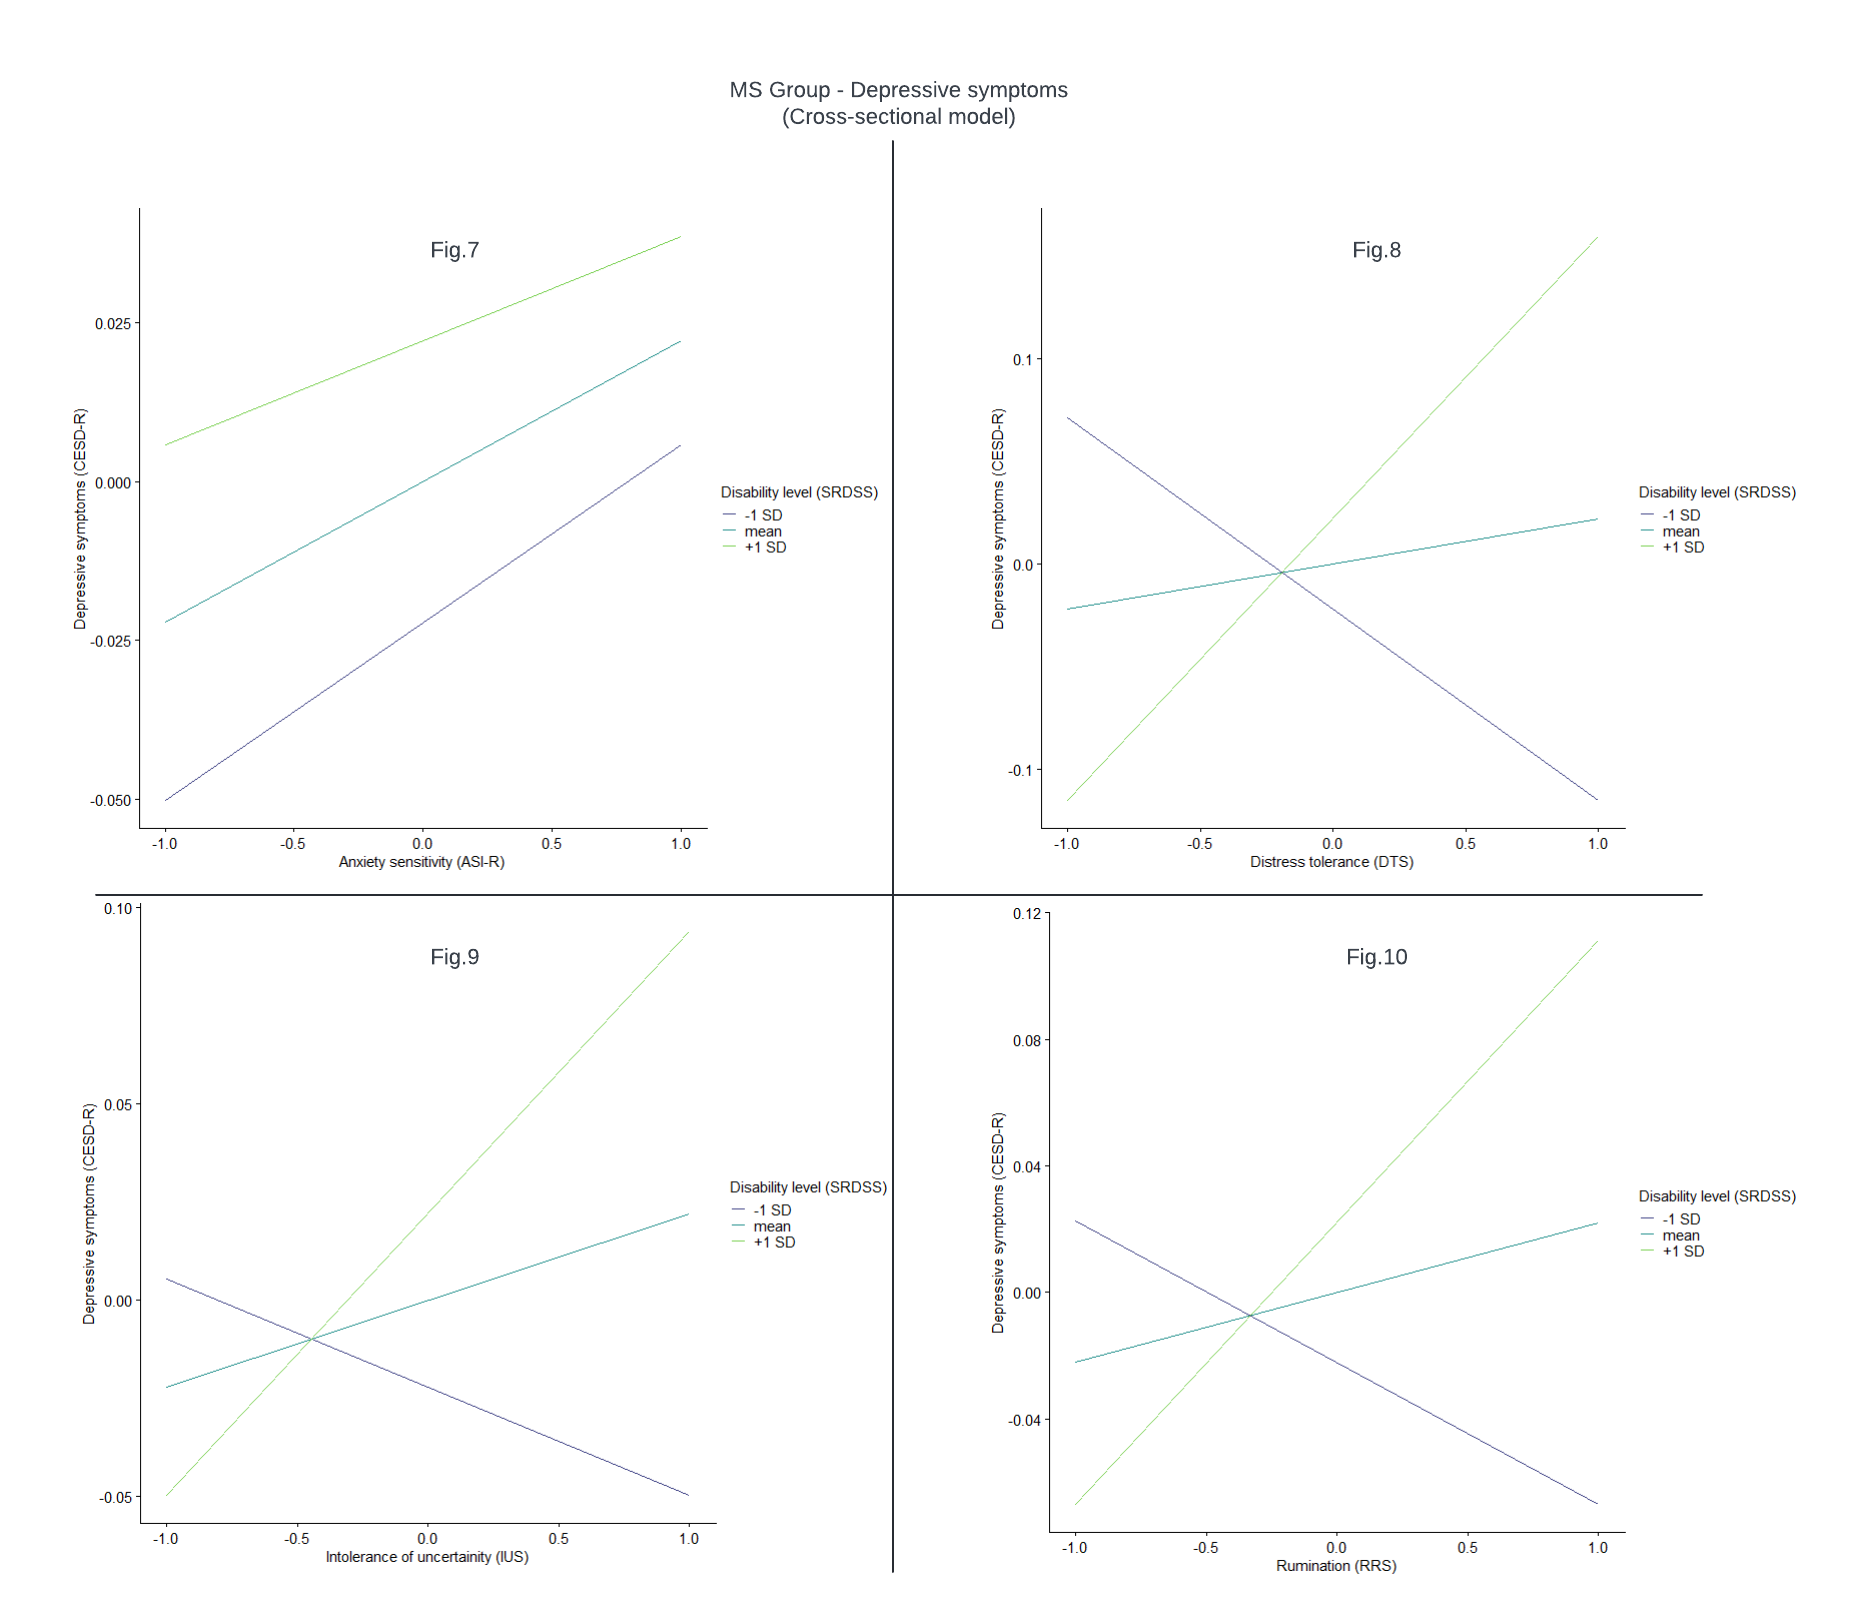


**Figures S11-14.** Interactions plot illustrating the moderation effects of pain severity (POQ-SF) on the cross-sectional relationships between cognitive factors and anxiety symptoms in the EMS group.


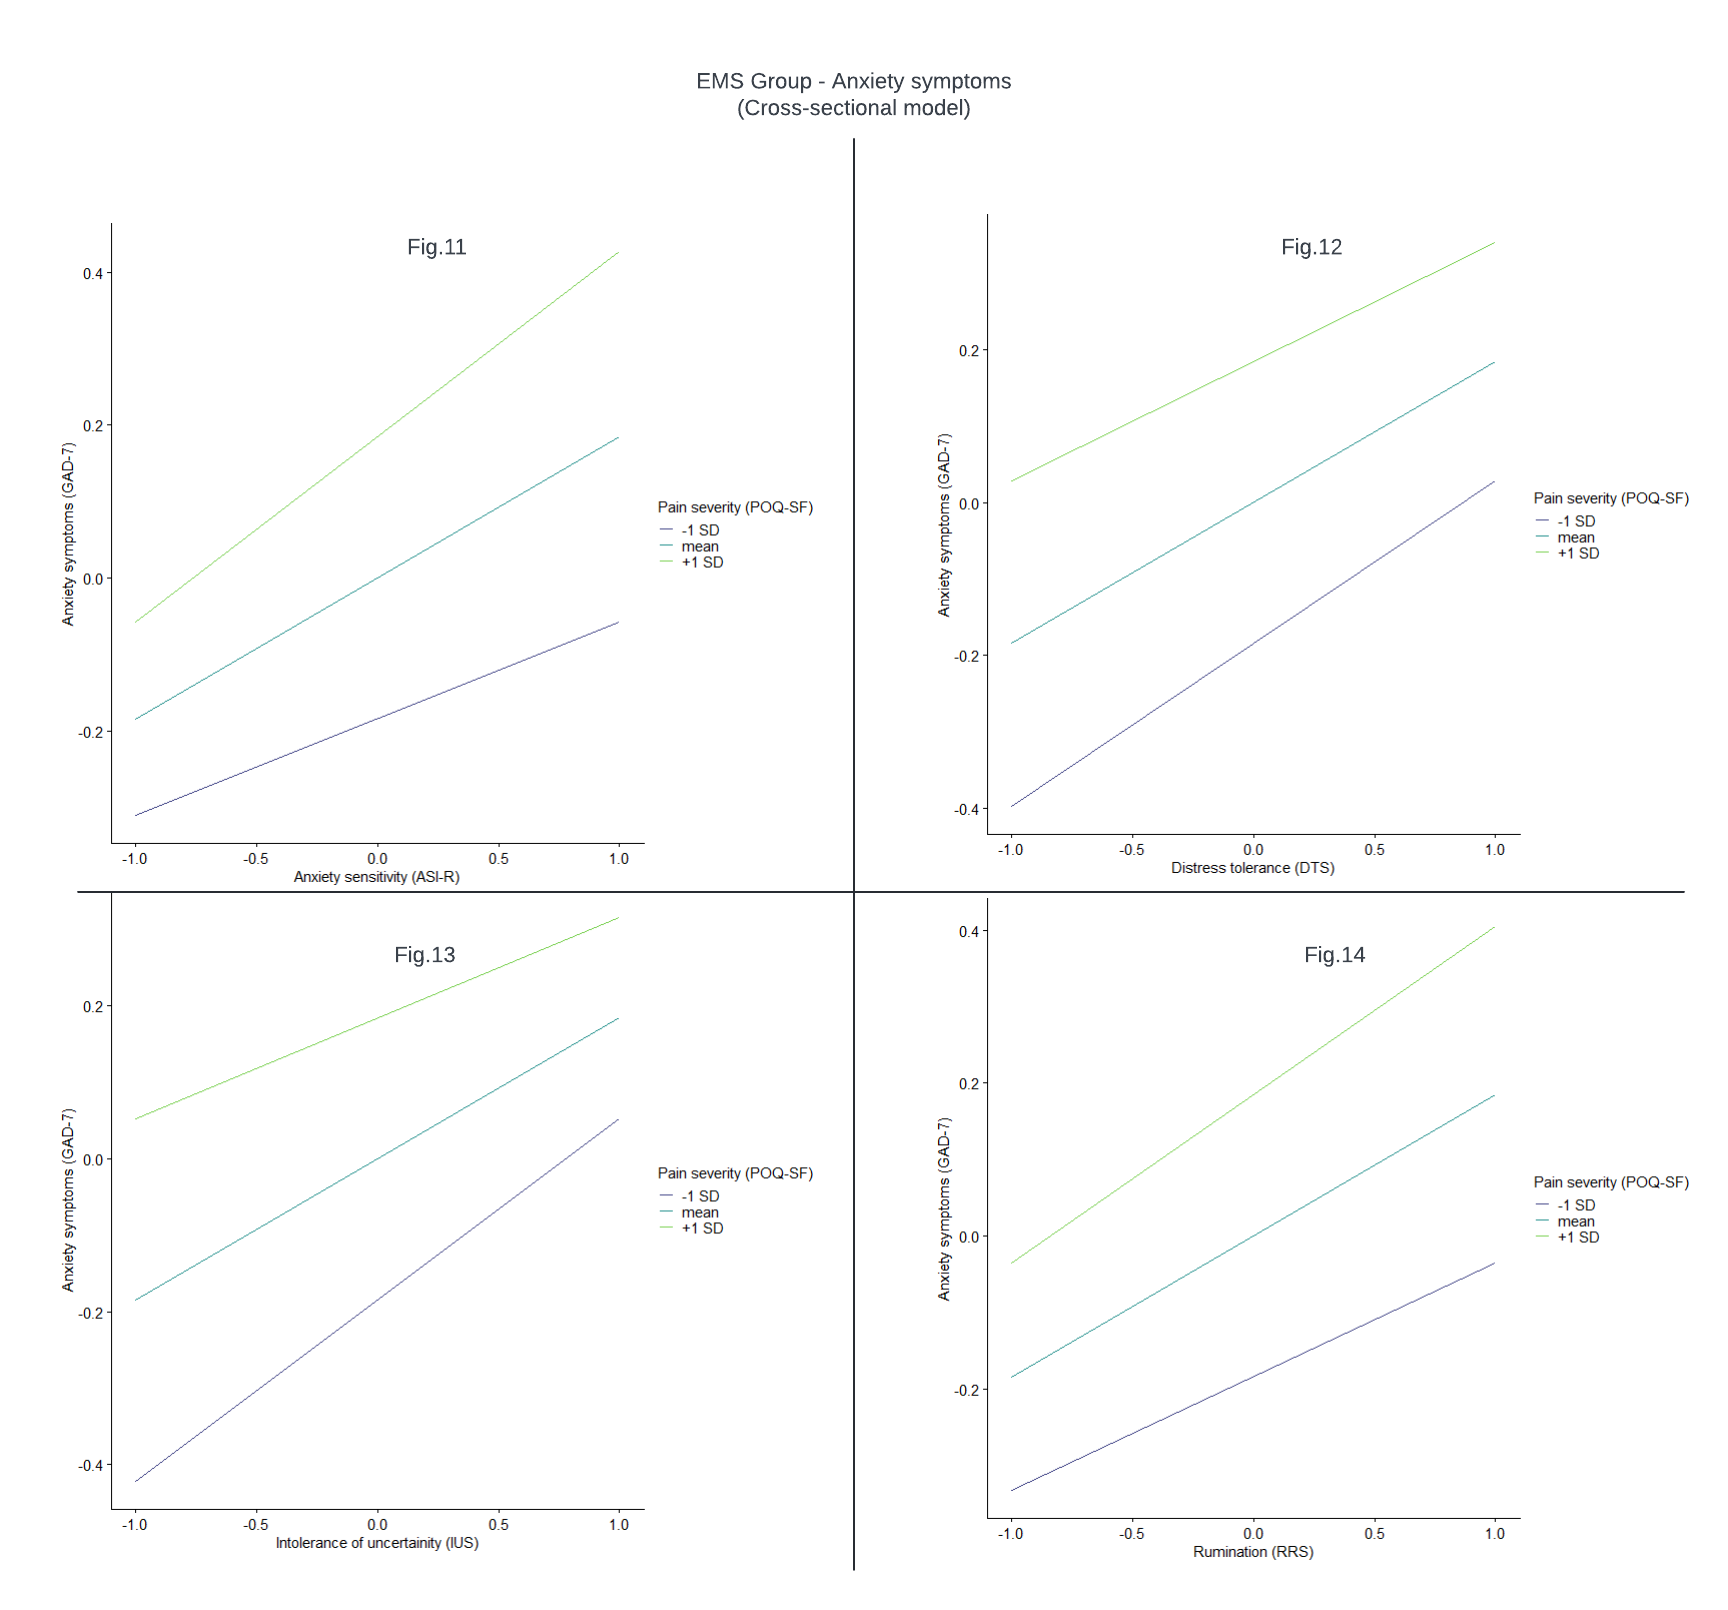


**Figures S15-18.** Interactions plot illustrating the moderation effects of pain severity (POQ-SF) on the cross-sectional relationships between cognitive factors and depressive symptoms in the EMS group.


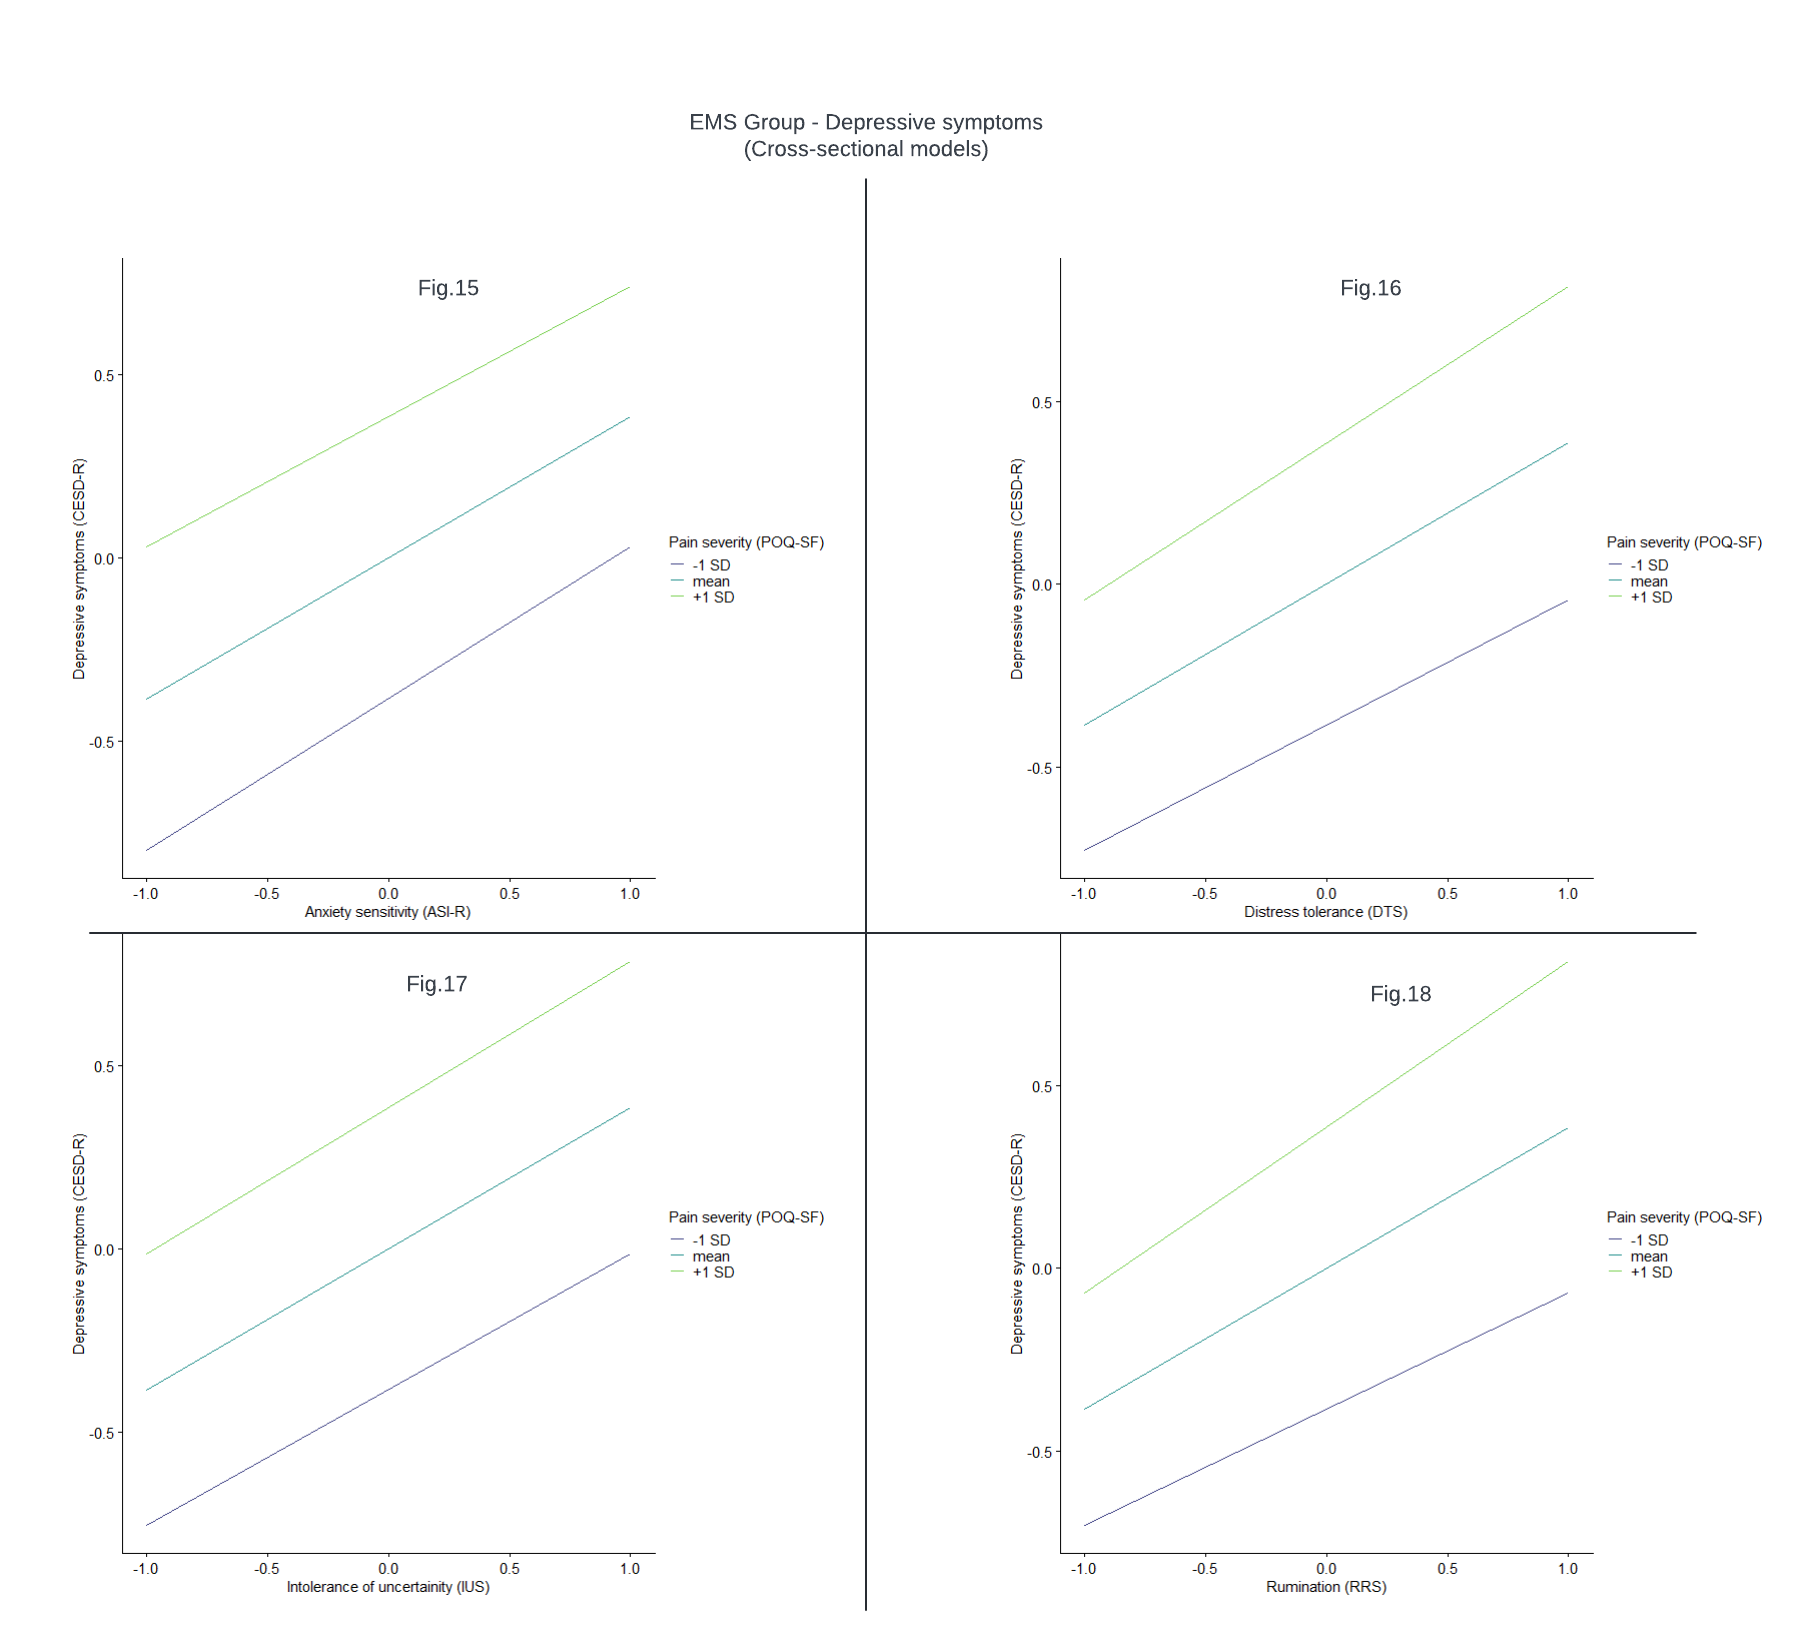


**Figures S19-22.** Interactions plot illustrating the moderation effects of gait-disability level (SRDSS) on the longitudinal relationships between cognitive factors and anxiety symptoms in the MS group.


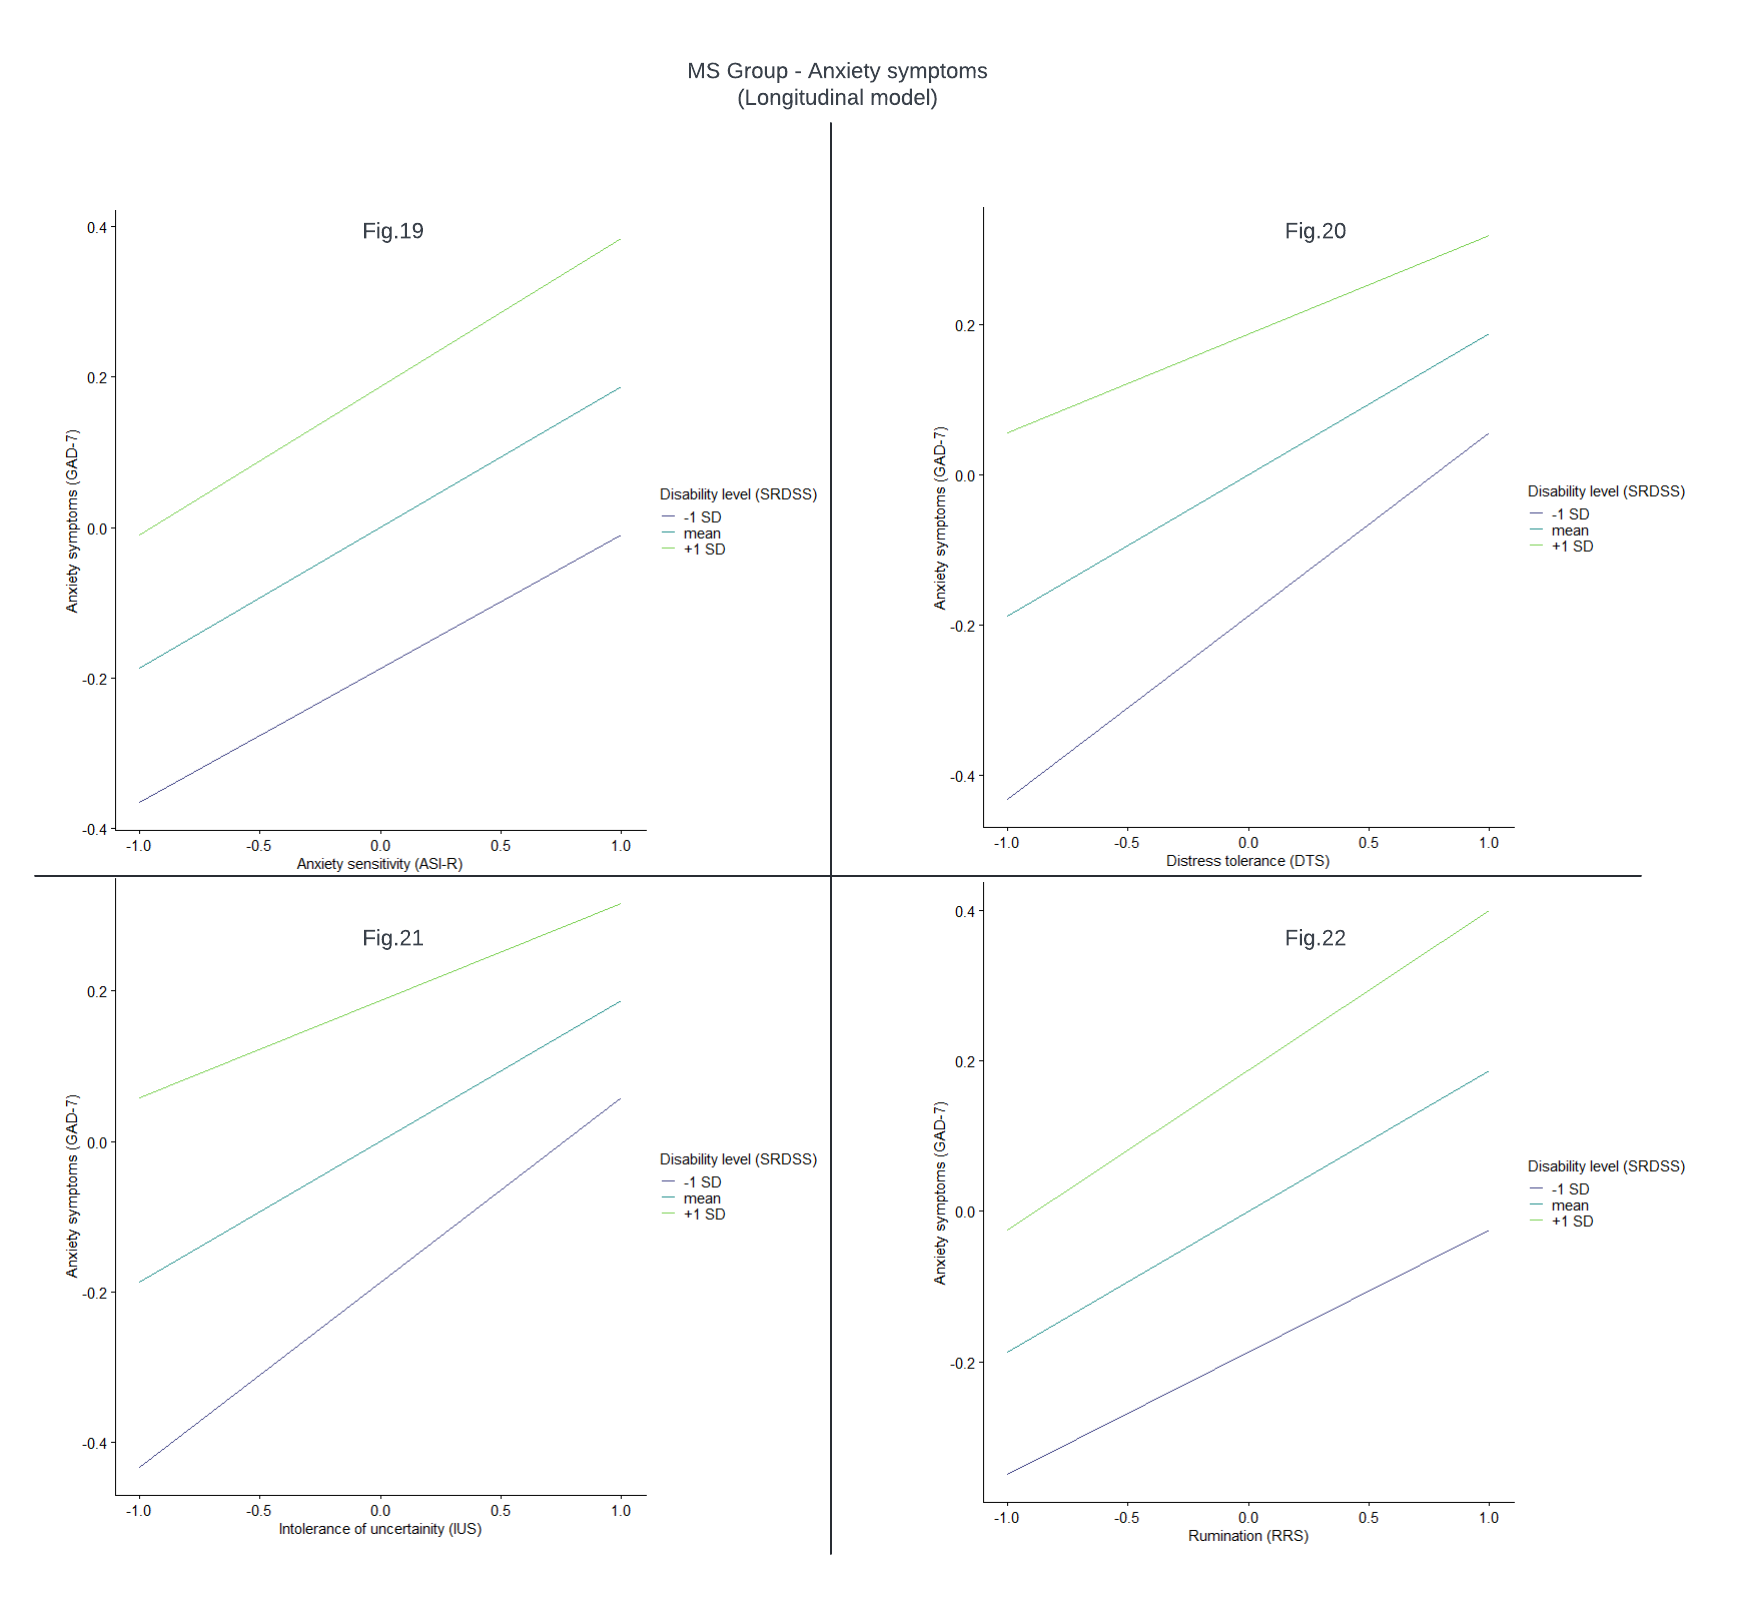


**Figures S23-26.** Interactions plot illustrating the moderation effects of gait-disability level (SRDSS) on the longitudinal relationships between cognitive factors and depressive symptoms in the MS group.


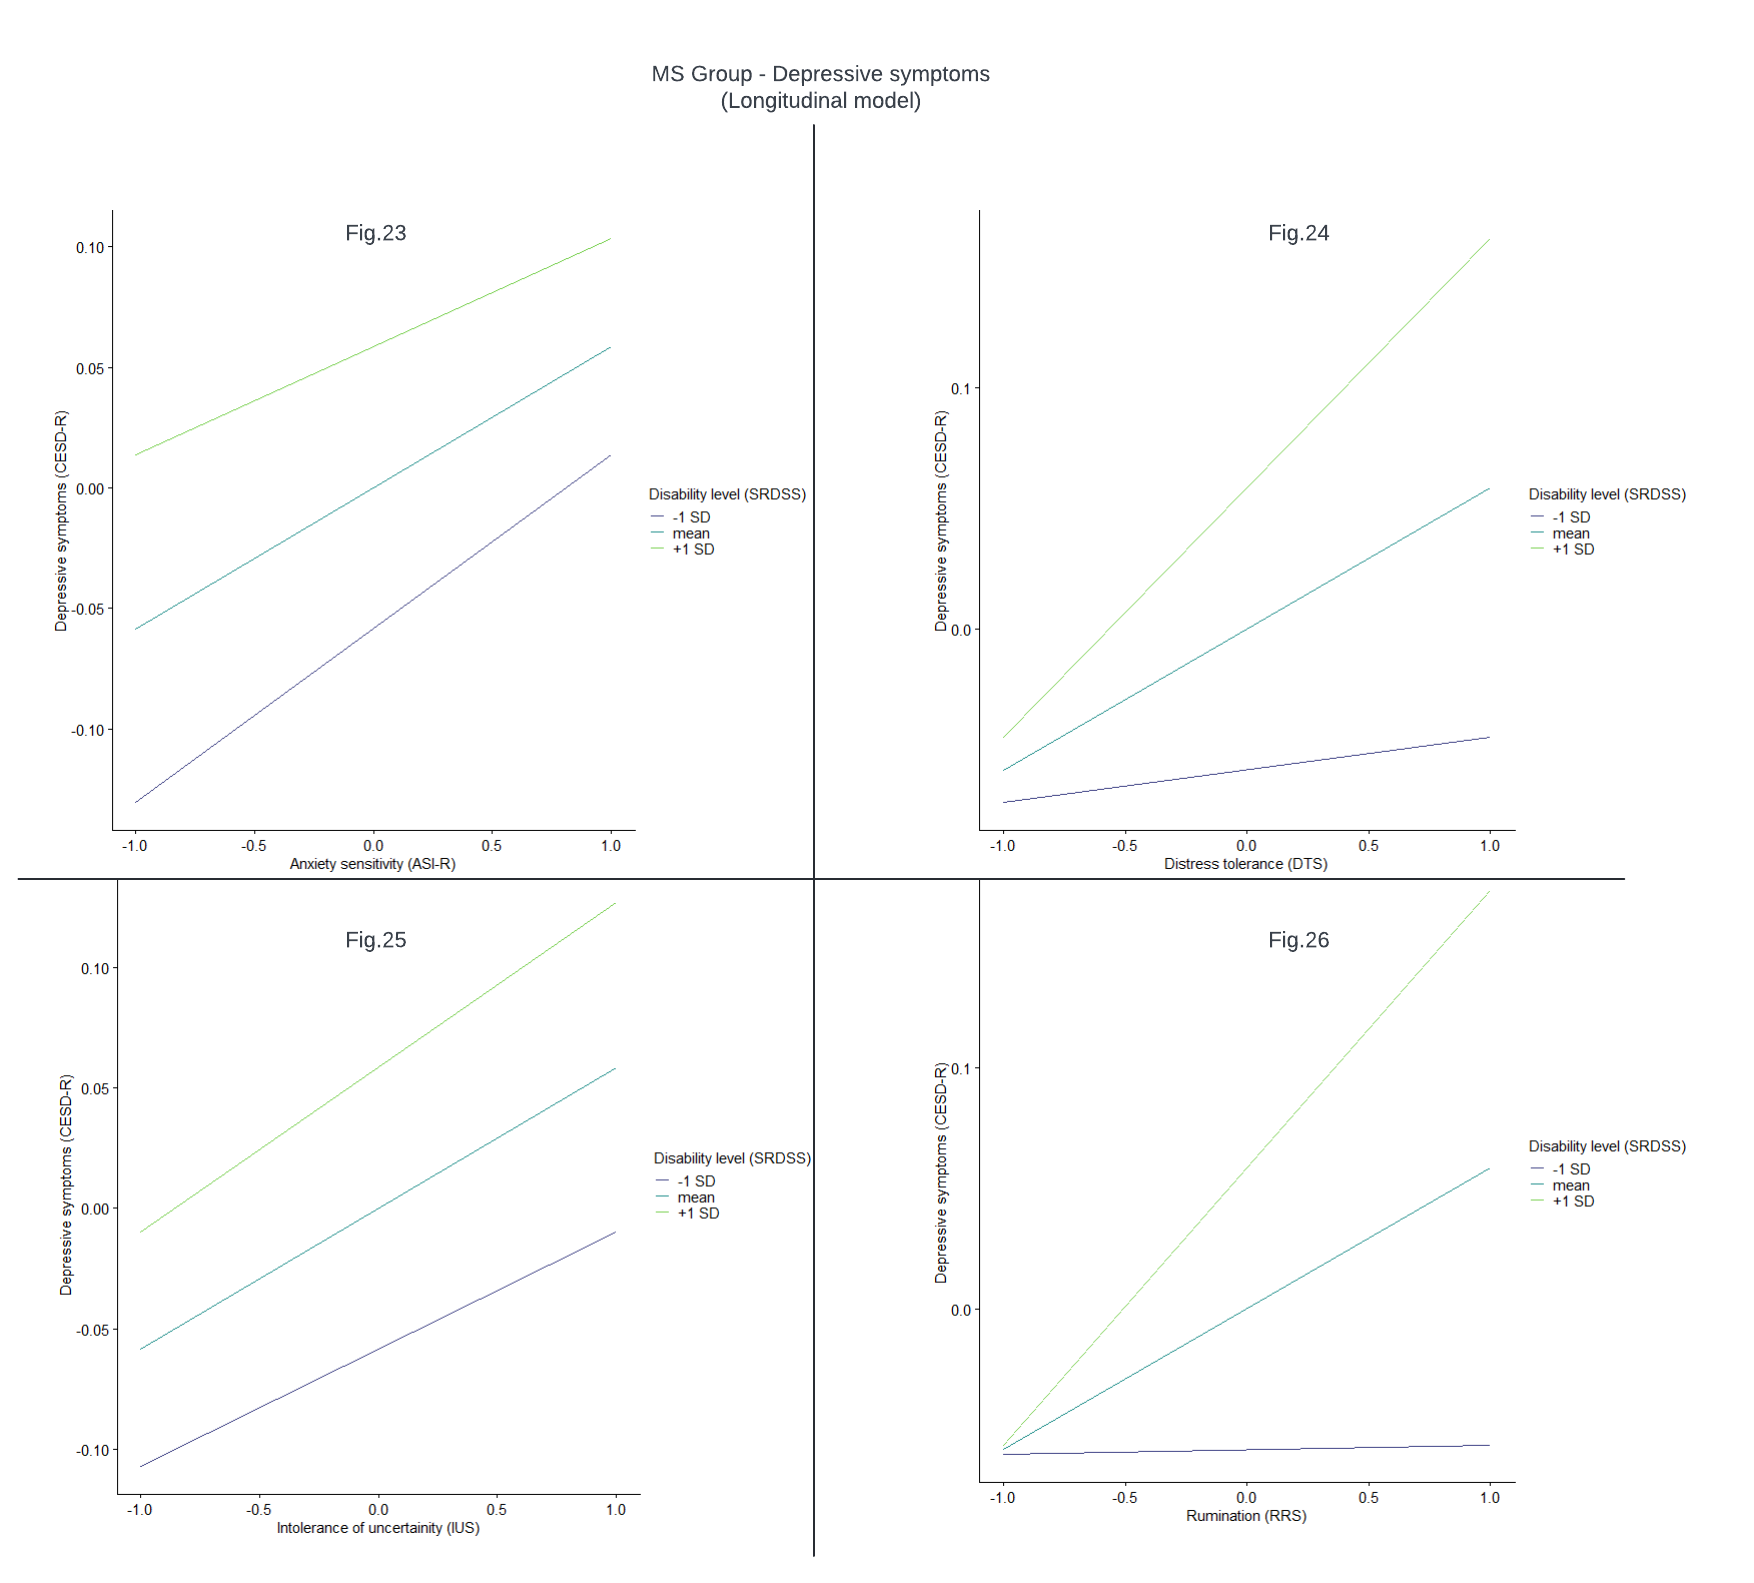


**Figures S27-30.** Interactions plot illustrating the moderation effects of pain severity (POQ-SF) on the longitudinal relationships between cognitive factors and anxiety symptoms in the EMS group.


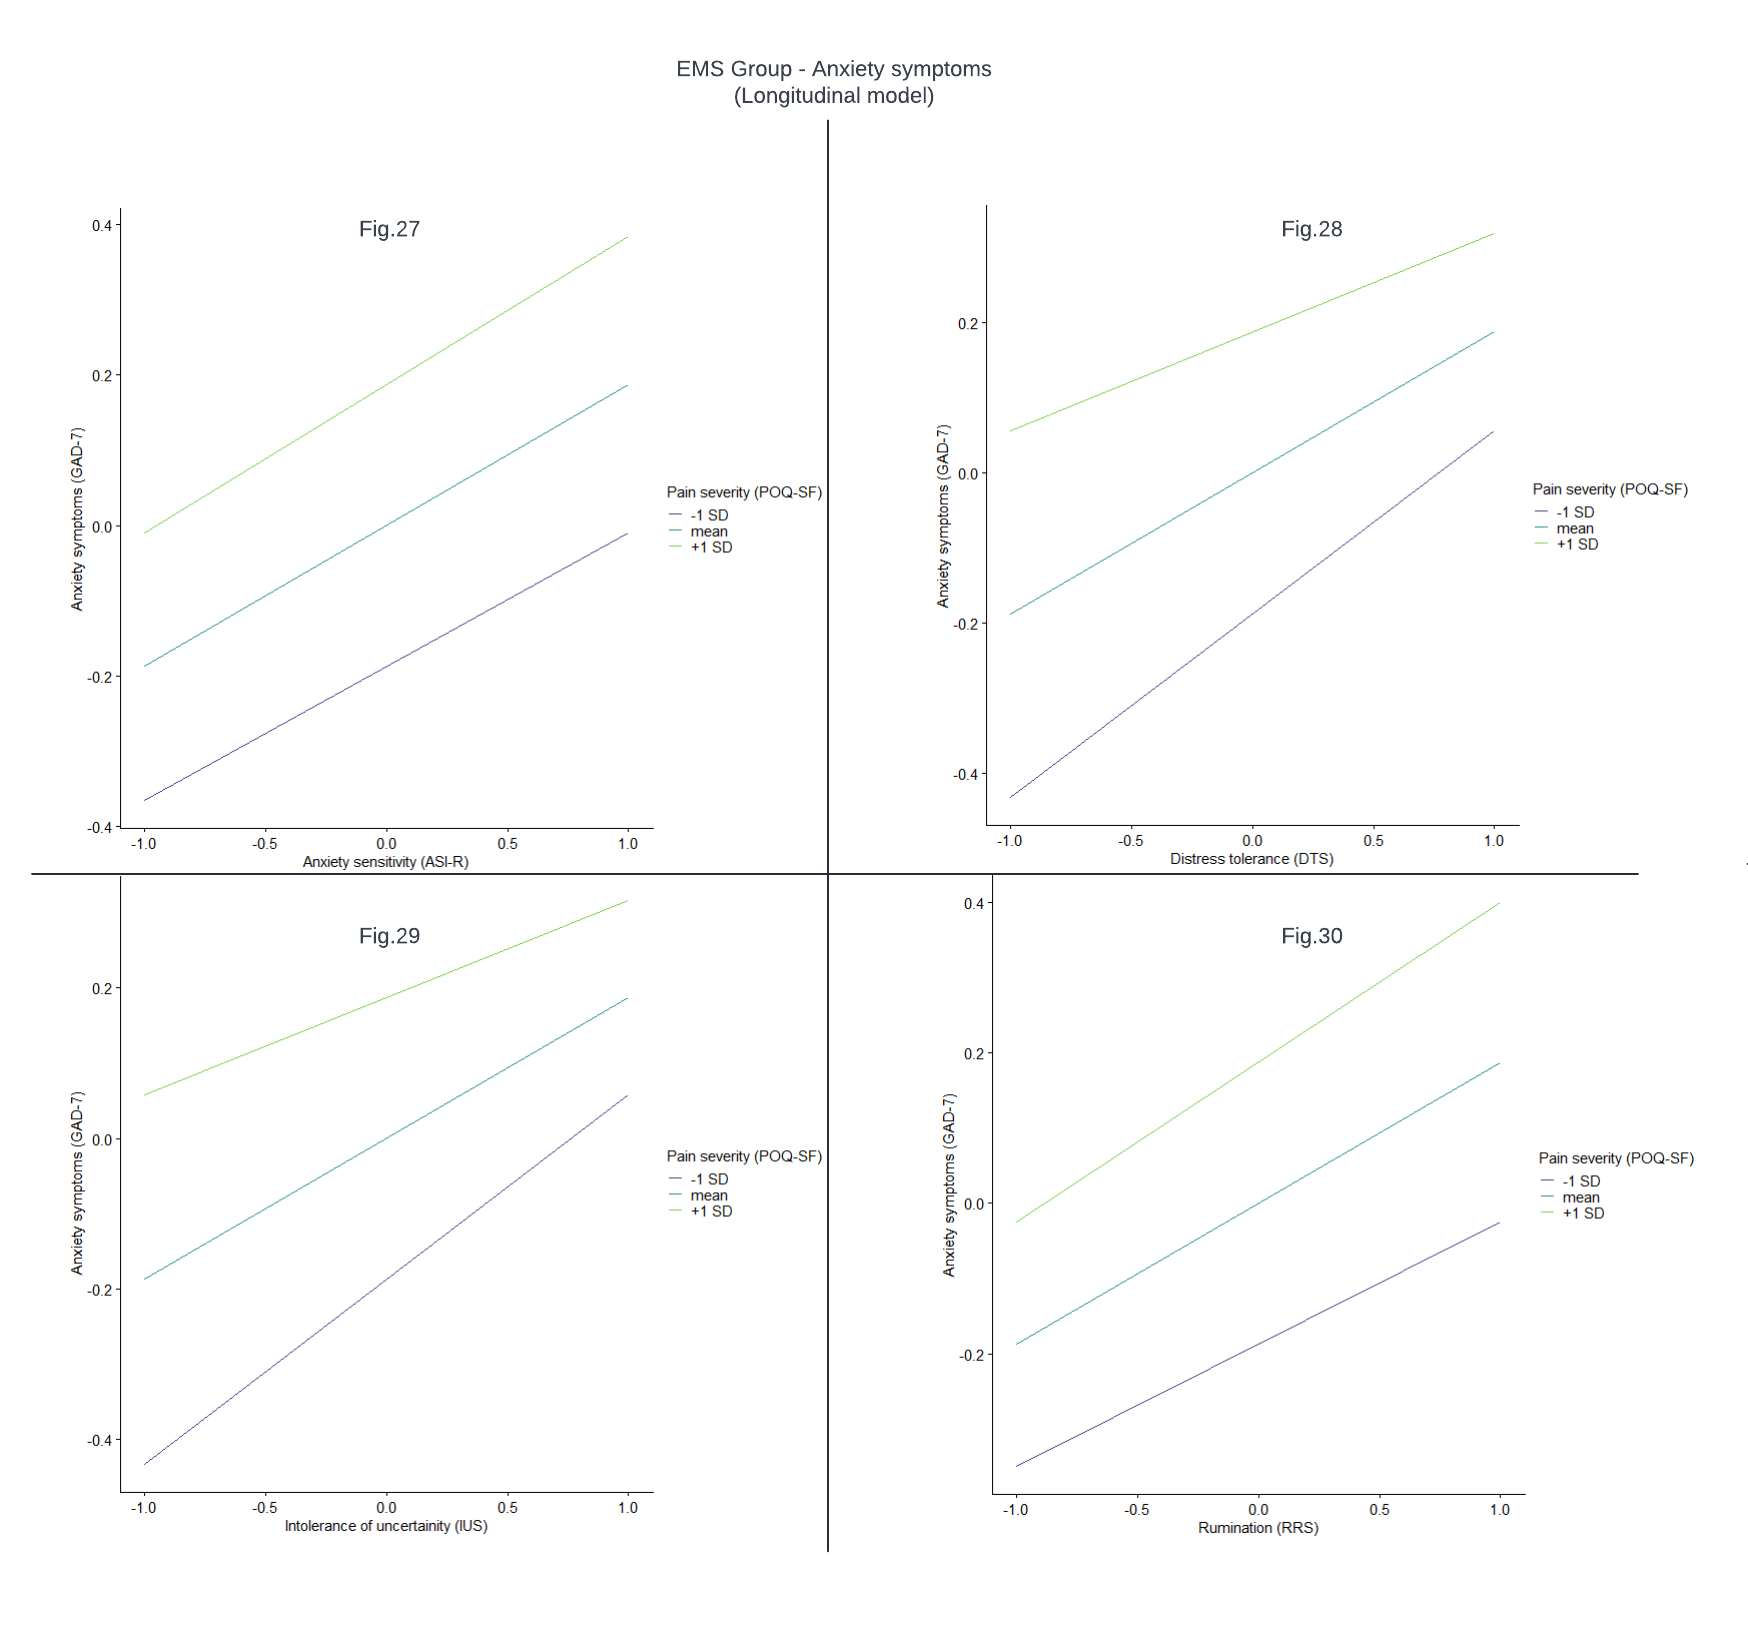


**Figures S31-34.** Interactions plot illustrating the moderation effects of pain severity (POQ-SF) on the longitudinal relationships between cognitive factors and depressive symptoms in the EMS group.

*
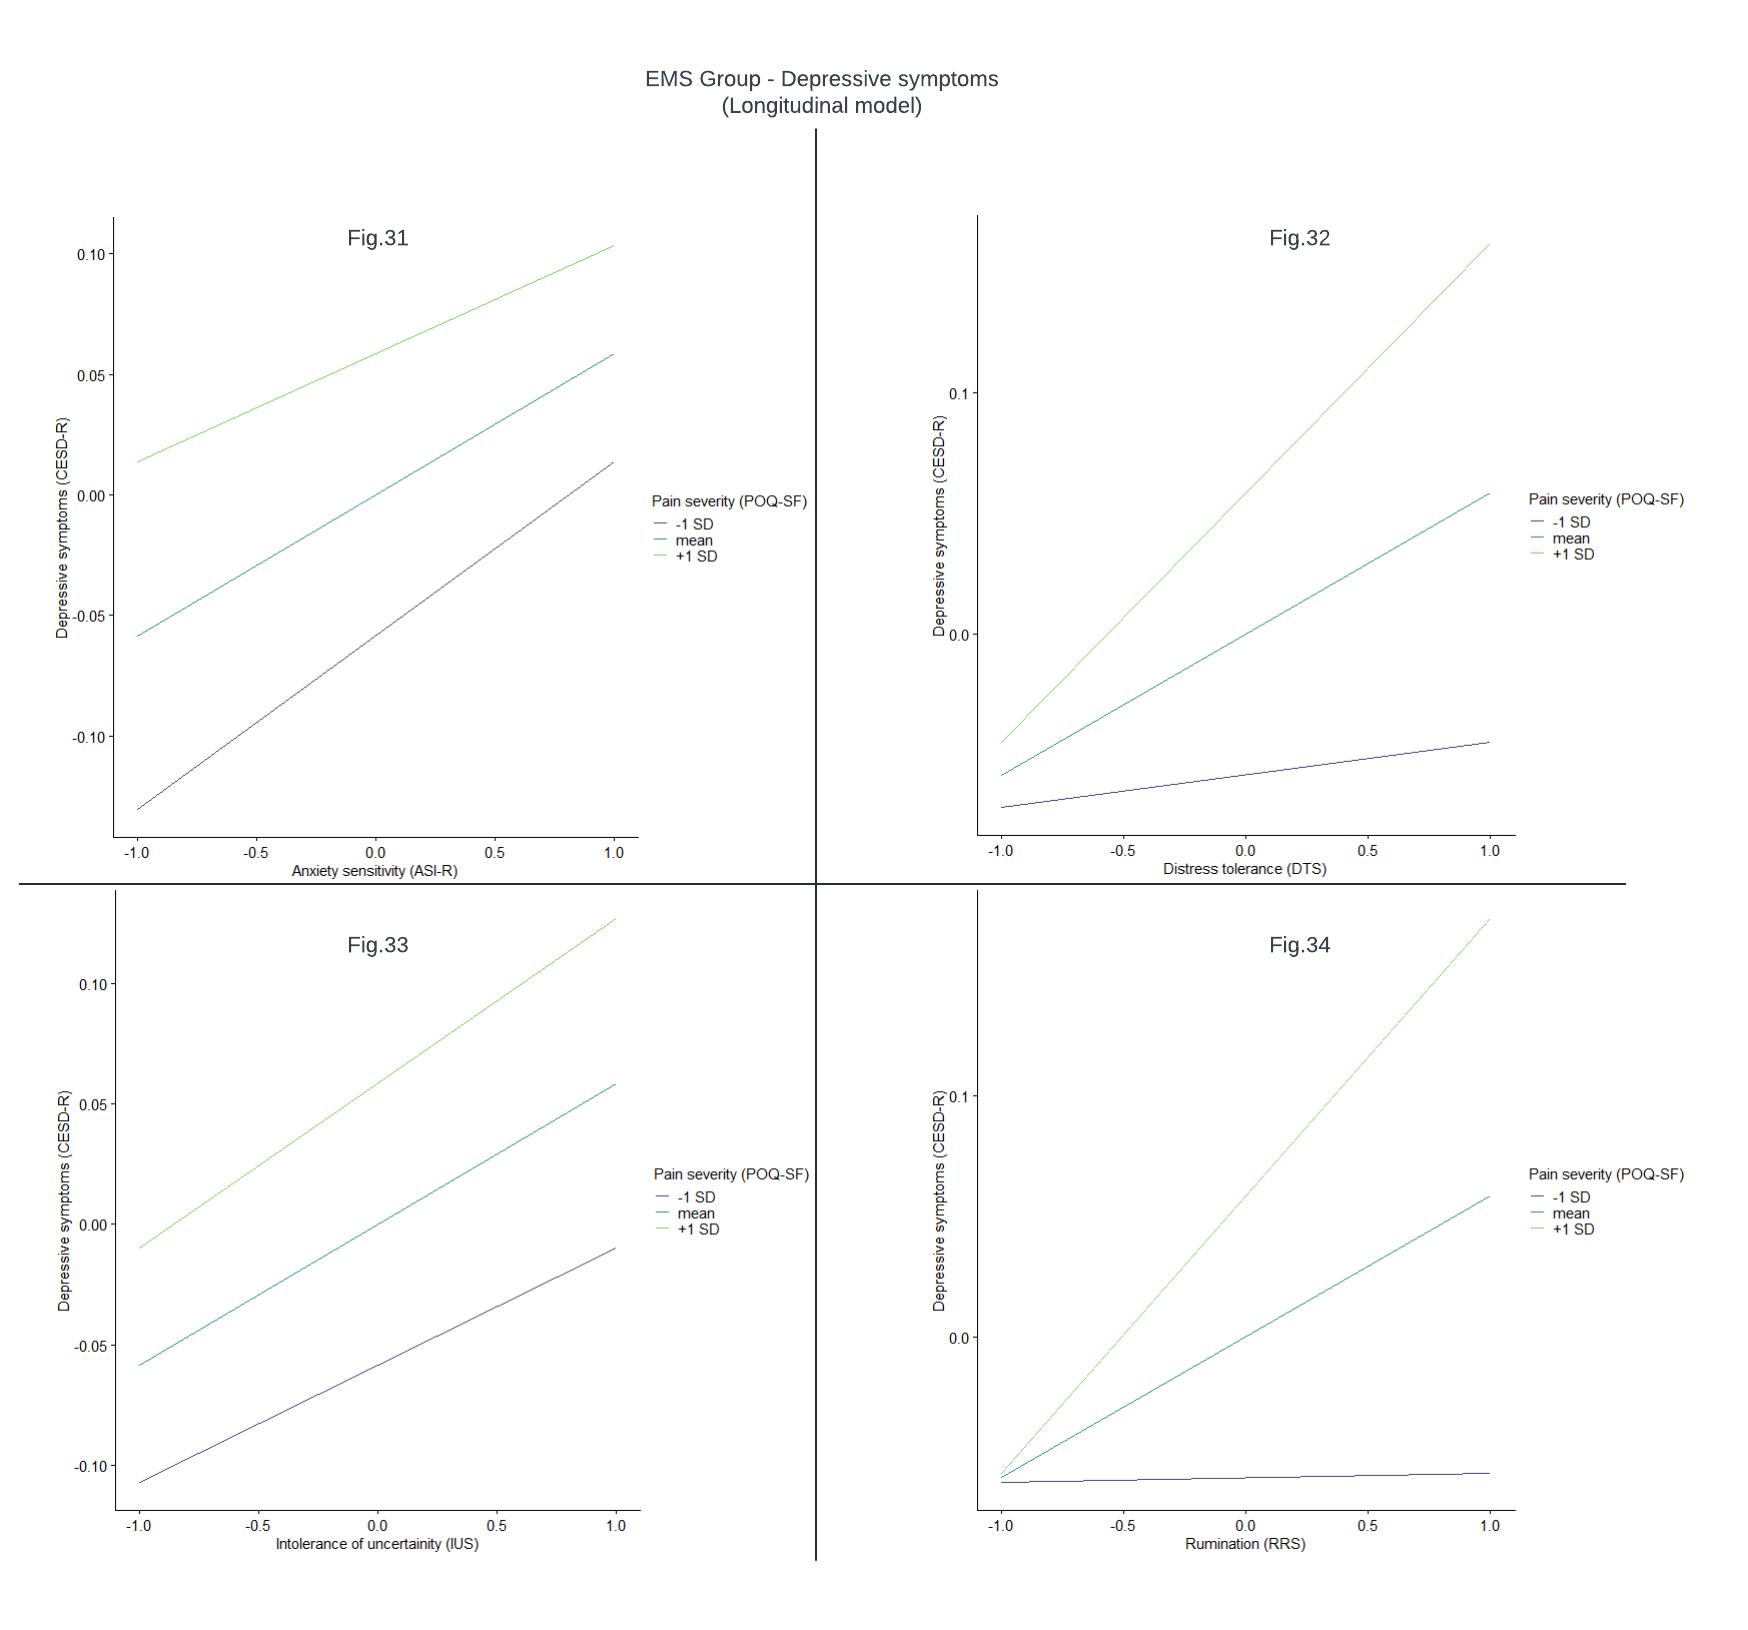
*
