# Supplementary material
Source: Research Square preprint supplement (doi:10.21203/rs.3.rs-9195106/v1)
Supplement: Supplementary file 6 [file a9b21fdd6877ae536c66baab.docx]

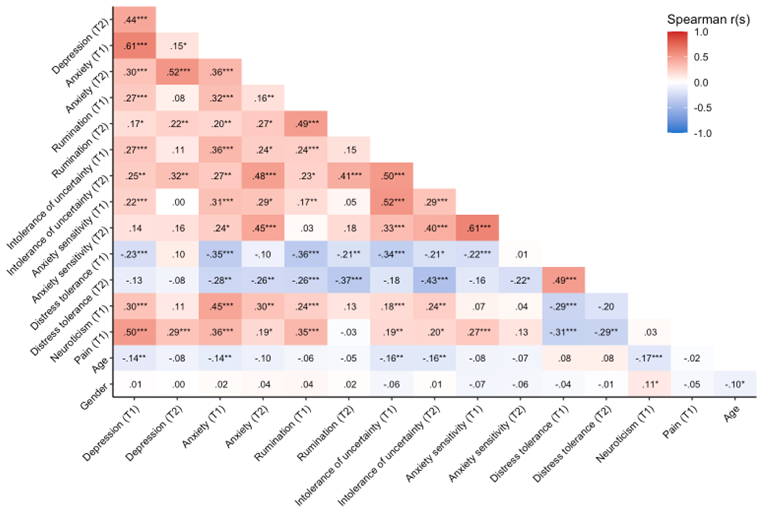
**Figure S2.** Heatmap reflecting two-tailed partial bivariate Spearman rank-order correlations between model variables in the EMS group, adjusted for age, gender, and pain severity.

*Note:* *=*p* < .05,**= *p* < .001, ***=*p*<.0001. Gender coded as a binary variable (0= men, 1= women).
