# Supplementary material
Source: Research Square preprint supplement (doi:10.21203/rs.3.rs-9195106/v1)
Supplement: Supplementary file 7 [file ba55af055a81878246734b28.docx]

**Figure S1.** Heatmap reflecting two-tailed partial bivariate Spearman rank-order correlations between model variables in the MS group, adjusted for age, gender, and gait-disability.


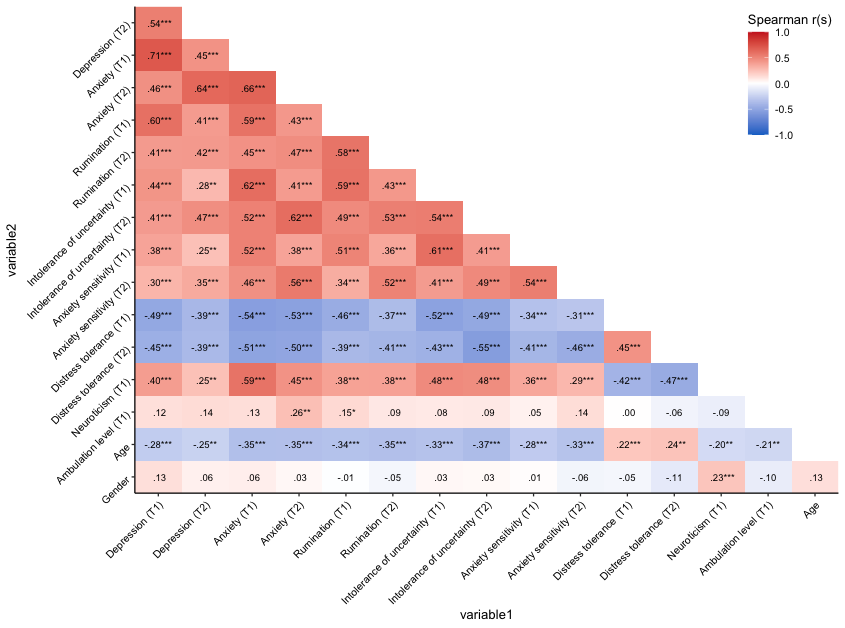


*Note:* *=*p* < .05,**= *p* < .001, ***=*p*<.0001. Gender coded as a binary variable (0= men, 1= women).
