# Supplementary material
Source: Research Square preprint supplement (doi:10.21203/rs.3.rs-9195106/v1)
Supplement: Supplementary file 8 [file c2425a4fd2deebc41375d061.docx]

**Table S6.**

*Comorbidities in MS and Endo samples (combined)*

| **Disease type** | **N** |
| --- | --- |
| **Cancer** |  |
| **Autoimmune and inflammatory conditions** |  |
| Arthritis | 21 |
| Coeliac disease | 13 |
| **Gastrointestinal** |  |
| IBS | 23 |
| Coeliac disease | 13 |
| GERD | 7 |
| Oesophageal reflux disease | 4 |
| Gastritis | 3 |
| Gastroparesis | 3 |
| GORD | 2 |
| Diverticulitis | 2 |
| Crohn’s disease | 1 |
| Interstitial cystitis | 5 |
| SIBO | 1 |
| Hiatus hernia | 1 |
| CIU | 1 |
| Oesophagus dysmotility | 1 |
| Intestinal metaplasia | 1 |
| Intestinal failure |  |
| **Endocrine** |  |
| Diabetes | 14 |
| Hypothyroidism | 10 |
| Hashimoto’s disease | 10 |
| Iron deficiency/anaemia | 5 |
| Hypercholesterolemia | 1 |
| Adrenal fatigue | 1 |
| Pituitary gland adenoma | 1 |
| Thalassemia minor | 1 |
| Addison’s disease | 1 |
| **Cardiovascular** |  |
| Migraine | 19 |
| Hypotension/hypertension | 13 |
| Postural orthostatic tachycardia syndrome | 8 |
| High cholesterol | 5 |
| Narcolepsy | 2 |
| Post-thrombotic syndrome | 1 |
| Neurocardiogenic syncope | 1 |
| Peripheral vascular disease | 1 |
| SVT-Junctional tachycardia | 1 |
| Vasovagal syncope | 1 |
| **Neurological** |  |
| Chronic inflammatory demyelinating polyneuropathy | 1 |
| Meniere’s disease | 1 |
| Schizencephaly | 1 |
| Epilepsy | 1 |
| Essential tremor | 1 |
| Dystonia | 1 |
| Trigeminal neuralgia | 1 |
| ***Psychiatric** |  |
| ADHD | 14 |
| C-PTSD/PTSD | 18 |
| ASD | 4 |
| OCD | 7 |
| Trichotillomania | 1 |
| BPD | 4 |
| Sensory processing disorder | 1 |
| Schizoaffective | 1 |
| Dissociative identity disorder | 1 |
| **Musculoskeletal** |  |
| Osteoporosis | 6 |
| Hypermobility syndrome | 6 |
| Scoliosis | 4 |
| Ligamentous laxity | 1 |
| Ankylosing spondylitis | 1 |
| Ehlers danlos syndrome | 1 |
| Hip dysplasia | 1 |
| Myofascial pelvic pain syndrome | 1 |
| Ostemyelitis | 1 |
| Carpal tunnel syndrome | 1 |
| Sacroiliac joint disorder | 1 |
| Baxter nerve entrapment | 1 |
| **Respiratory** |  |
| Asthma | 30 |
| Sleep apnea | 3 |
| COPD | 1 |
| Restrictive lung disease | 1 |
| Bronchiectasis | 1 |
| Inducible laryngeal obstruction | 1 |
| **Dermatological** |  |
| Rosacea | 4 |
| Psoriasis | 4 |
| Lichen sclerosis | 2 |
| Hidradenitis suppurative | 2 |
| Shingles | 1 |
| Chronic idiopathic urticaria | 1 |
| **Haematological** |  |
| Pernicious anaemia | 1 |
| Immune thrombocytopenic purpura | 1 |
| ‘Bleeding disease’ | 1 |
| **Urological/renal** |  |
| Hydronephrosis | 1 |
| Chronic UTI | 1 |
| Neurogenic bladder | 1 |
| Kidney stones | 1 |
| **Reproductive or gynaecological** |  |
| PCOS | 16 |
| Adenomyosis | 14 |
| Pelvic inflammatory disease | 1 |
| Vaginismus | **3** |
| Vulvodynia | **1** |
| Pelvic congestion | **1** |
|  |  |
| **Auto-immune or inflammatory** |  |
| Fibromyalgia | 26 |
| Chronic rhinosinusitis | 1 |
| **Metabolic** |  |
| Dejerine-sottas disease | 1 |
| Sclerosis tuberosa | 1 |
| Gilbert syndrome | 1 |
| Langerhans cell histiocytosis | 1 |
| Thalassemia minor | 1 |
| **Ophthalmological** |  |
| Photophobia | 2 |
| Meningioma | 1 |

*Note.* *= does not include depressive or anxiety disorder diagnoses.
