# Supplementary material
Source: Research Square preprint supplement (doi:10.21203/rs.3.rs-9195106/v1)
Supplement: Supplementary file 9 [file ec9c328cf6ff8c6f8f722fee.docx]

**Table S2.**

*Attrition analyses comparing baseline characteristics of participants retained at T2 and lost to follow-up.*

|  | | Endo samples | | | | MS samples | | | |
| --- | --- | --- | --- | --- | --- | --- | --- | --- | --- |
|  | Retained at T2  (n= 130) | | Lost to follow-up  (n= 269) | Test statistic | *p-*values | Retained at T2  (n= 134) | Lost to follow-up  (n= 95) | Test statistic | *p-*values |
| Age (M±SD), median (range) | 33.16 (7.36), 32 (10) | | 32.49 (7.65), 31 (10) | .83 | .41 | 46.30 (12.32), 47 (18) | 42.82 (13.63), 41 (18) | 2.01 | .05 |
| Gender (females, %) | 124 (96.15%) | | 267 (99.25%) | .16 | .92 | 109 (81.34%) | 71 (74.74%) | 3.00 | .22 |
| Years since formal diagnosis (M ±SD), median (range) | 4.14 (4.08), 2.63 (5.33) | | 4.42 (4.87), 3.33 (3.75) | -.41 | .68 | 10.81 (8.83), 7.42 (11.50) | 8.14 (7.40), 5.46 (7.77) | 2.16 | <.05 |
| MS relapse (yes, %) | - | | - |  |  |  |  |  |  |
| Current |  | |  |  |  | 20 (14.93%) | 21 (22.11%) | 1.19 | .27 |
| Preceding 12mths |  | |  |  |  | 72 (53.73%) | 47 (49.47%) | 2.57 | .28 |
| SRDSS categories (*n*, %) | - | | - |  |  |  |  | 3.49 | .17 |
| ≤3.5 |  | |  |  |  | 27 (20.14%) | 23 (24.21%) |  |  |
| 4-6.5 |  | |  |  |  | 75 (55.97%) | 48 (50.53%) |  |  |
| ≥7 |  | |  |  |  | 32 (23.88%) | 24 (25.26%) |  |  |
| POQ-SF Pain severity (M ±SD), median (range) | 96.43 (25.83), 95 (30) | | 104.77 (25.88), 107 (34.75) | -2.60 | <.05 | 92.47 (27.54), 91.50 (42.75) | 89.83 (31.93), 95 (48) | .62 | .54 |
| Intolerance of uncertainty (M±SD), median (range) | 70.88 (19.88), 71 (31) | | 78.26 (19.73), 80 (30) | -3.25 | <.01 | 64.24 (22.06), 64 (38) | 72.75 (23.07), 76.50 (30.25) | -2.64 | <.05 |
| Distress tolerance (M±SD), median (range) | 44.18 (11.34), 44 (17) | | 42.93 (12.58), 43 (20) | .88 | .38 | 48.13 (14.25), 47.50 (22.75) | 48.82 (14.67), 46.50 (22.25) | -.34 | .73 |
| Rumination (M±SD), median (range) | 24.18 (5.85), 24 (8) | | 24.35 (5.86), 25 (8) | -.27 | .79 | 21.30 (6.61), 22 (9) | 21.91 (6.17), 22 (8) | -.67 | .51 |
| Anxiety sensitivity (M±SD), median (range) | 54.33 (28.54), 55 (41.75) | | 63.17 (31.07), 66 (39.50) | -2.51 | <.05 | 45.40 (31.49), 41.50 (56.50) | 53.95 (30.81), 65 (53) | -1.96 | .05 |
| Depressive symptoms (M±SD), median (range) | 33.48 (17.25), 34.50 (29.25) | | 32.78 (17.74), 33.50 (27.75) | .36 | .72 | 28.97 (16.47), 25 (24) | 26.12 (16.54). 24.50 (27) | 1.28 | .20 |
| Anxiety symptoms (M±SD), median (range) | 9.88 (5.68), 9 (8) | | 10.22 (5.58), 11 (8) | -.57 | .57 | 7.72 (5.82), 7 (11) | 7.64 (5.72), 8 (8) | .10 | .92 |
| Depressive disorder (yes, %) | 81 (62.31%) | | 136 (50.56%) | 6.70 | <.01 | 69 (51.49%) | 52 (54.74%) | .02 | .94 |
| Anxiety disorder (yes, %) | 79 (60.77%) | | 155 (57.63%) | 1.01 | .31 | 47 (35.07%) | 45 (47.37%) | 2.28 | .13 |
| Comorbid conditions (yes, %) | 82 (63.08%) | | 171 (63.57%) | 2.11 | .35 | 71 (52.99%) | 48 (50.53%) | .44 | .80 |

*Note.* Variables were examined using pooled linear models with estimated marginal means and contrasts for continuous variables, and categorical variables were analysed using Pearson’s chi-square tests (with Yates’ continuity correction). (-) Variables are not explicitly relevant to disease-type. In all inferential analyses, the ‘Lost to follow-up’ group were used as the reference group.

Abbreviations: MS*=* Multiple sclerosis; SRDSS= Self-Administered Expanded Disability Status Scale; POQ-SF= Pain Outcomes Questionnaire-Short Form.
